# Supplementary material
Source: PubMed Central journal article supplement (PMC7611649)
Supplement: EMS127849-supplement-Suppl__Mat_.pdf [file EMS127849-supplement-Suppl__Mat_.pdf]

# MOLECULAR ECOLOGY RESOURCES

Supplemental Information for:

**Opening a next-generation black box: ecological trends for hundreds of species-like taxa uncovered within a single bacterial >99% 16S rRNA operational taxonomic unit**

Martin W. Hahn, Andrea Huemer, Alexandra Pitt, and Matthias Hoetzing

## Table of Contents:

|                 |             |
|-----------------|-------------|
| <b>Text S1</b>  | Pages 2-5   |
| <b>Fig. S1</b>  | Pages 6-7   |
| <b>Fig. S2</b>  | Page 8      |
| <b>Fig. S3</b>  | Page 9      |
| <b>Fig. S4</b>  | Page 10     |
| <b>Fig. S5</b>  | Page 11     |
| <b>Fig. S6</b>  | Page 12     |
| <b>Table S1</b> | Page 13     |
| <b>Table S2</b> | Pages 14-23 |
| <b>Table S3</b> | Page 24     |

## Supplementary Materials Text S1

### Development of PCR primers targeting a protein-encoding gene

We aimed on development of a primer pair suitable for specific amplification of a protein-encoding gene present in all *Polynucleobacter* bacteria from environmental samples. Due to the high polymorphisms of protein-encoding genes in *Polynucleobacter* strains, we expected to find suitable primer binding sites in the more conserved intergeneric sequences. We screened 61 genomes of *Polynucleobacter* strains for single copy genes in the length range of 198 to 348 bp for primer binding sites in their up- and downstream spacers. This length range was chosen in order to ensure high quality sequences from paired-end sequencing by the Illumina MiSeq system (2x300 bp read length). This search resulted only in a single gene with a suitable phylogenetic resolution and rather conserved flanking primer binding sites. Unfortunately, it turned out that primers matching to the various sequences of all four *Polynucleobacter* subgroups are not possible if a high degree of primer degeneration should be avoided. Therefore, only a primer pair specific for subcluster PnecC was further developed. In order to reveal the sequence variability at the targeted primer binding sites, the priB gene including flanking regions of a large number of cultivated strains were sequenced. The finally available set of priB sequences used for checking the primer binding sites included 377 sequences (254 non-redundant priB sequences, Suppl. Mat. Table S2). The binding site of the developed forward primer priBinnFd starts in the spacer region upstream of the priB gene and covers the first 14 bp of the priB gene. The binding site of the reverse primer priBinnRd is located a few bp downstream of the priB gene. The forward primer and the reverse primer contain two and one degenerated positions, respectively. In total, 14 of the 351 priB sequences representing subcluster PnecC showed mismatches with the forward primer. These 14 sequences cluster in eight OTU<sub>98%</sub> (see below), of which two represent endosymbionts. The reverse primer did not show any mismatch with sequences of strains affiliated with subcluster PnecC. The primer pair amplifies sequences of 285-288 bp length, whereas the length polymorphism originates from indels located immediately downstream the priB gene. In some cases, the priB genes of strains affiliated with other *Polynucleobacter* subclusters differ in length from the genes of PnecC strains.

## Sequence similarity threshold for discrimination of species-like OTU

We aimed on sequencing of priB amplicons of PnecC bacteria in environmental samples representing ecological gradients. Furthermore, we aimed on defining a sequence similarity threshold for clustering priB sequences in OTU best reflecting species-like OTU. In order to reveal potential thresholds, 102 *Polynucleobacter* genome sequences were clustered in species-like taxa by using a genome-based species delineation threshold of 95% average nucleotide identity (ANI) [1, 2]. Next, we compared intra- and interspecific priB sequence similarity values (Fig. 1) and observed that the best priB threshold for species discrimination is > 4 bp sequence differences, which equals 98.3% sequence similarity. Two species showed for a few pairwise comparisons < 98% intraspecific priB sequence similarity, which accounted for 0.2% of all pairwise comparisons. This mainly involved comparisons between the amplus and simplex subgroups of *P. asymbioticus* [3]. On the other hand, some species delineated by ANI values < 95% showed priB sequence similarities > 98.3% (< 4 bp). This was the case in 2% of the pairwise comparisons of the 102 analyzed genomes. Such species were lumped into species complexes, of which seven were established. Based on a reference set of 254 priB sequences (non-redundant) and a threshold of 98% sequence similarity, 117 reference OTU<sub>98%</sub> (refOTU) could be established (Suppl. Mat. Table S2). These 117 refOTU represent 108 species-like OTU, one species split into two refOTU and seven species complexes. The reference taxonomy list (Suppl. Mat. Table S2) was used for initial classification of OTU<sub>98%</sub> obtained from environmental samples. All environmental OTU<sub>98%</sub> not sharing with one of the reference sequences a sequence similarity of  $\geq 98\%$  were termed environmental OTU (eOTU; Suppl. Mat. Table S2).

## Amplicon sequencing of environmental samples

Sequencing of the amplicons of 120 priB samples (117 environmental samples and three controls) resulted in  $18.7 \times 10^6$  raw paired-end sequences. Quality filtering and denoising removed  $5.7 \times 10^6$  sequences. Length filtering for sequences < 285 or > 288 bp, and exclusion of sequences encoding additional stop codons removed 2208 sequences. Most of the sequences with an additional stop codon within the priB gene were found among the sequences only present with copy numbers < 10. In order to remove other sequences potentially impacted by PCR or sequencing errors, all sequences, which

appeared only in a single sample with copy numbers of  $< 10$  were removed, which excluded another 900 sequences. Three samples were excluded from further analyses due to too low sequence numbers. The remaining 117 samples (114 environmental samples representing 99 habitats and three controls) were rarefied to 25 230 sequences per sample. A rarefaction analysis revealed that absolute sequence type (ASV) richness of all but one sample had reached an asymptote already for smaller sequence numbers (Supplementary Fig. S2). The remaining sequences represented 3210 ASV, which were clustered with a threshold of 98% sequence similarity in OTU, which were classified in a two-step process by using the reference sequence set. In the two controls with template DNA of one and four cultured strains, respectively, exclusively the expected OTU were detected. Another control consisted of a technical replicate of an OTU-rich environmental sample. The OTU specific read numbers of the two replicates correlated well (linear regression,  $R^2=0.98$ ,  $p=2.2e-16$ ).

In order to test if all obtained environmental priB sequences represent PnecC sequences, a phylogenetic tree was calculated with all environmental and all reference sequences. This revealed that almost all sequences clustered within subcluster PnecC of the genus *Polynucleobacter*. However, despite slight primer mismatches, 41 of the 600 OTU clustered within subcluster PnecB1. However, these 41 PnecB1 eOTU represented only 0.14% of all reads obtained from the 114 environmental samples and none of those eOTU represented more than 0.05% of the total number of obtained reads. Interestingly, all those detections of PnecB1 eOTU originate from alkaline habitats characterized by higher  $Ca^{2+}$  concentrations, which fits to previous observations [4], however, due to the primer mismatches it is unlikely that the observed ratios of PnecC to PnecB1 reads reflect any real differences in relative abundances of the two groups.

## References

1. Konstantinidis, K.T., A. Ramette, J.M. Tiedje, The bacterial species definition in the genomic era. *Philosophical Transactions of the Royal Society B: Biological Sciences*. 2006;361:1929-40.
2. Jain, C., L.M. Rodriguez-R, A.M. Phillippy, K.T. Konstantinidis, S. Aluru, High throughput ANI analysis of 90K prokaryotic genomes reveals clear species boundaries. *Nature Communications*. 2018;9:5114.

3. Hoetzing, M., J. Schmidt, J. Jezberová, U. Koll, M.W. Hahn, Microdiversification of a pelagic *Polynucleobacter* species is mainly driven by acquisition of genomic islands from a partially interspecific gene pool. *Appl. Environ. Microbiol.* 2017;83:e02266-16.
4. Jezbera, J., J. Jezberova, U. Koll, K. Hornak, K. Simek, M.W. Hahn, Contrasting trends in distribution of four major planktonic betaproteobacterial groups along a pH gradient of epilimnia of 72 freshwater habitats. *FEMS Microbiol. Ecol.* 2012;81:467-79.

**Suppl. Mat. Fig. S1.** Maps of Europe depicting all sampling sites (top, left),  $\text{Ca}^{2+}$  concentrations (middle column) and pH of habitats (right column) in the regions Lapland, Central Europe and the Mediterranean island Corsica (France). **Next page**, geographic distribution of detection and pH-specific occupancy of some selected taxa. *Polynucleobacter paneuropaeus* and *P. sphagniphilus* represent common taxa with frequently high relative abundance and high occupancy. By contrast, *P. wuianus* and *P. meluiroseus* represent only locally abundant taxa with low occupancy values. Note the different scaling used for plotting the relative local abundance of eOTU0124.

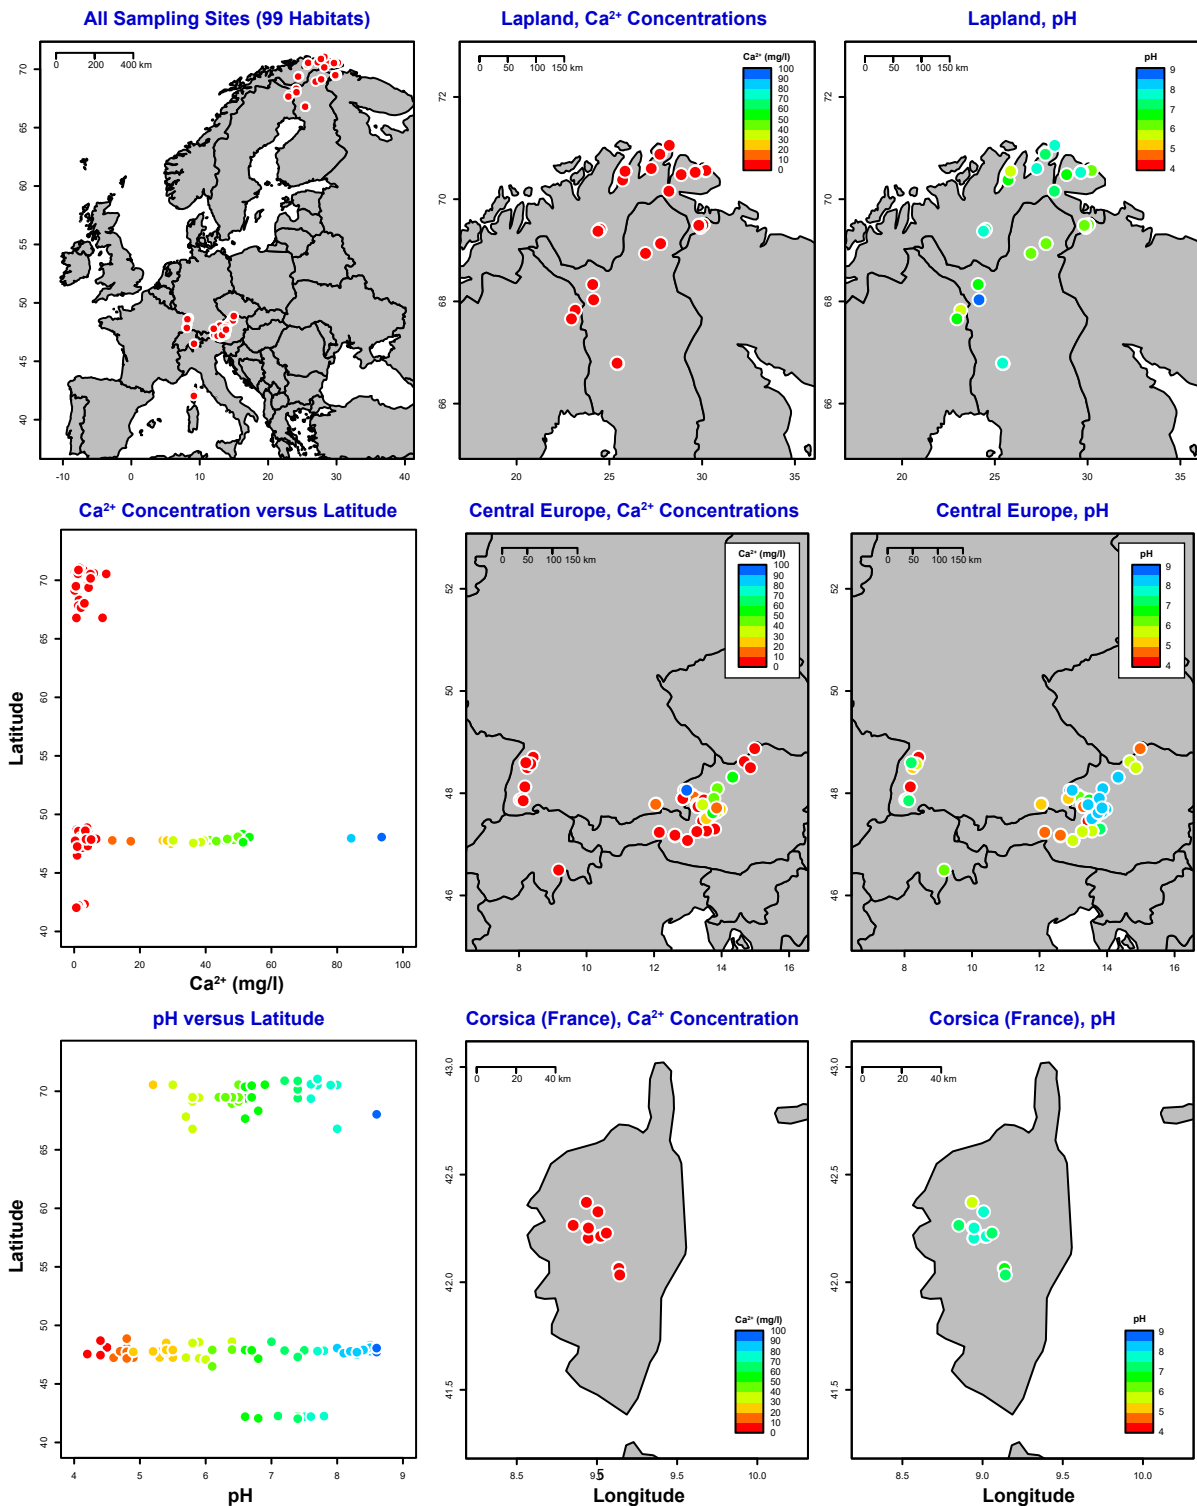

Suppl. Mat. Fig. S1 (continued).

*Polynucleobacter paneuropaeus*

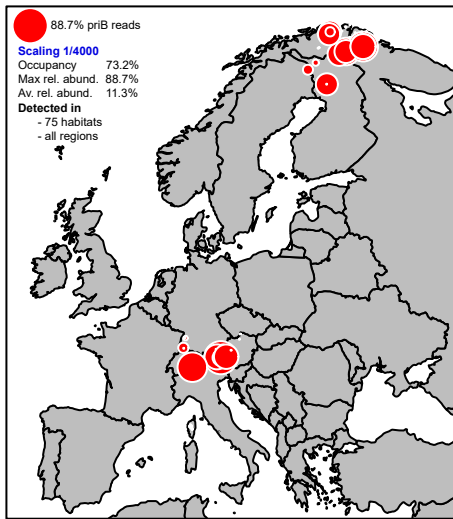

*Polynucleobacter sphagniphilus*

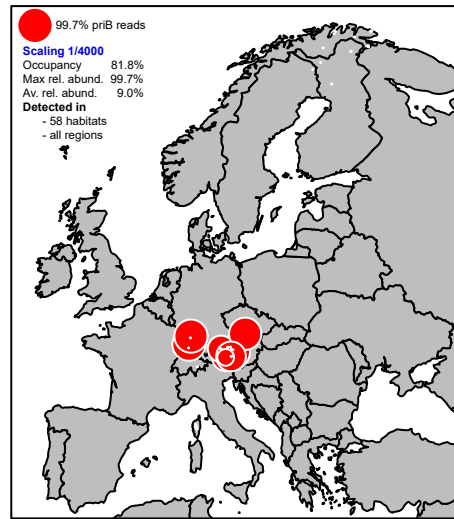

eOTU0002

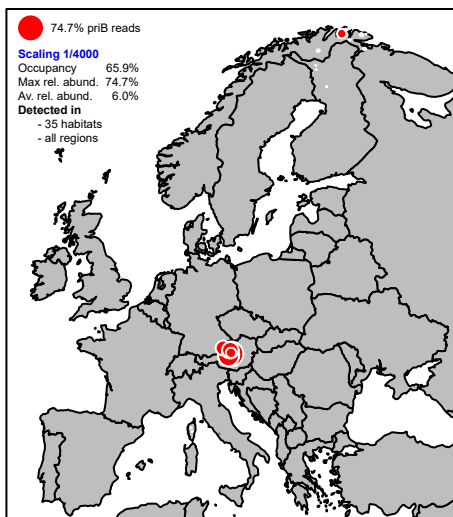

eOTU0124

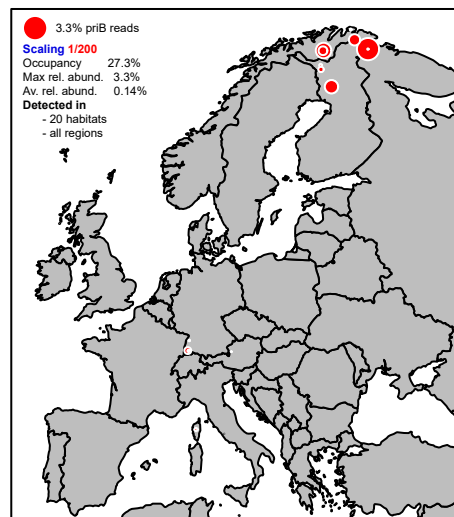

*Polynucleobacter wuianus*

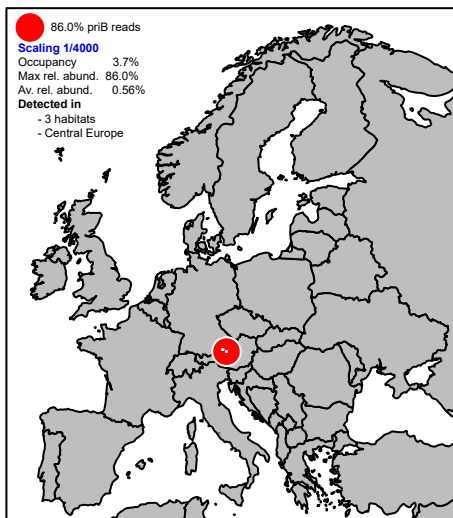

*Polynucleobacter meluiroseus*

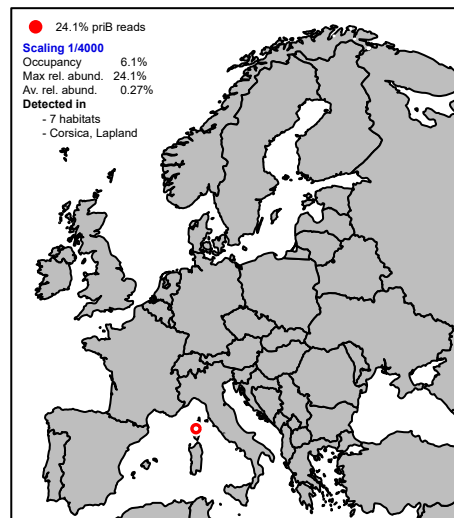

**Suppl. Mat. Fig. S2. (A)** Rarefaction analysis of number of amplicon sequence variants (ASV) observed in the different sequenced samples. Each curve represents an individual sample. The six samples with the highest estimated numbers represent the five investigated running water systems (including one technical replicate). In a subsequent step, the numbers of reads per sample were rarefied to 25230 reads. **(B)** Species accumulation curves determined by using a sample-based rarefaction method (Mao Tau estimates, R function specaccum, Vegan package). Richness of species-like OTU (> 98% sequence similarity threshold) was estimated for all detections and for detections above particular detection thresholds. The bars show unconditional standard deviations. **(C)** Log-normal rank-abundance curves of individual samples. The five samples with total taxon numbers > 100 represent the five running water samples.

**(A)**

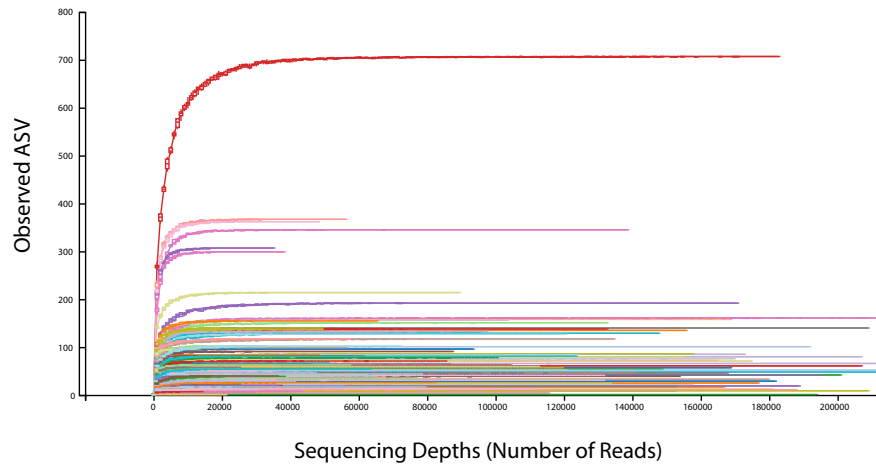

**(B)**

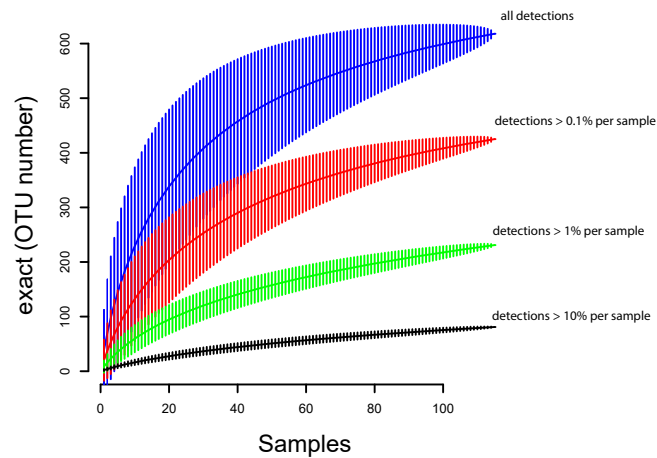

**(C)**

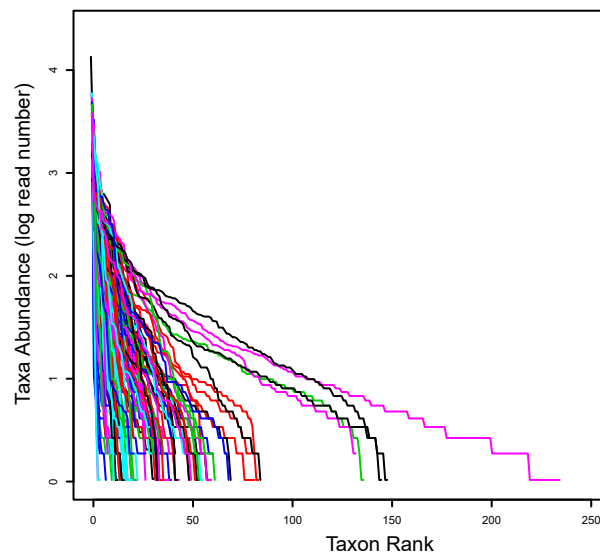



**Suppl. Mat. Fig. S3.** Canonical correspondence analysis (CCA, left column) and non-metric multidimensional scaling (NMDS) ordinations (right column) color-coded by pH of sample (A, B), by  $\text{Ca}^{2+}$  concentrations of samples (C, D), or by  $\text{Ca}^{2+}$ -preferences of the communities present in the different samples (E, F). The classification in the three community types corresponds to the classification shown in Fig. 4. The two plots shown in the top row are identical with those shown in Fig. 3 and are only displayed for comparison with the other plots.

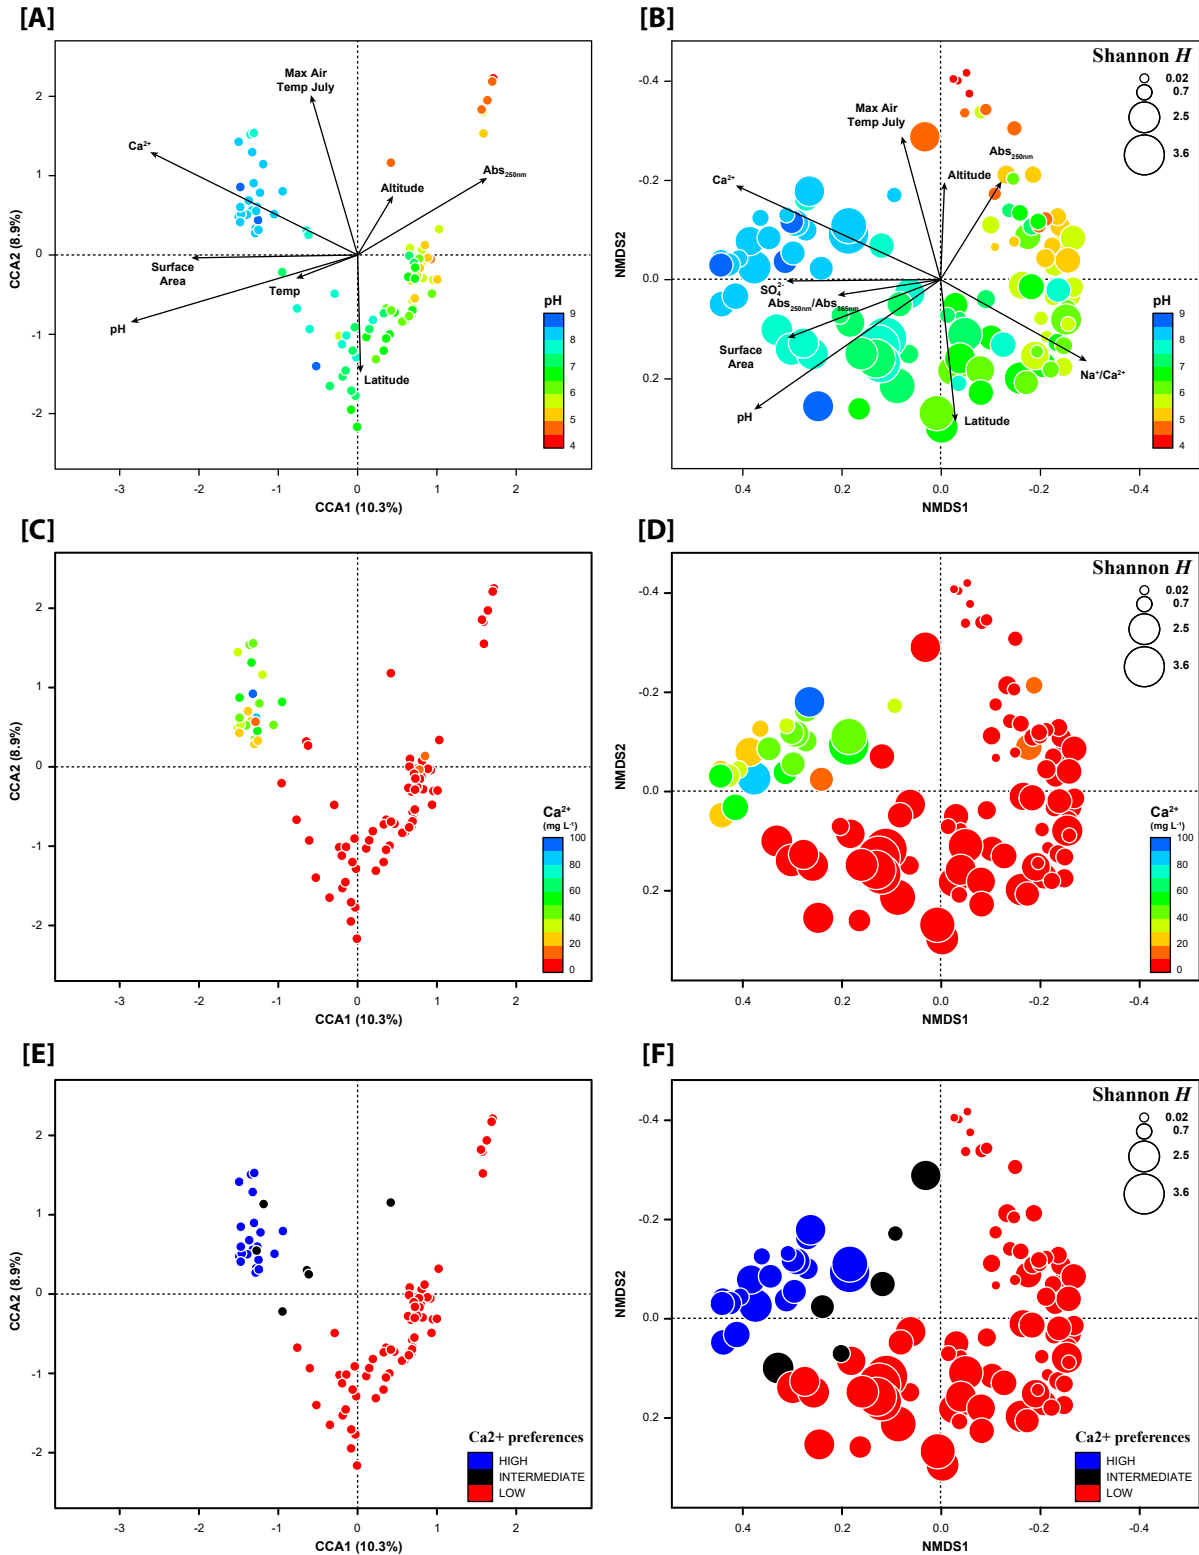

**Suppl. Mat. Fig. S4.** Variables used for the variation partitioning analyses and results of variation partitioning analyses.

**Chemical variables (Env)**

- pH
- Conductivity ( $\mu\text{S}/\text{cm}$ )
- Absorption, 250 nm (Abs250nm)
- $\text{Na}^+$  Concentration (mg/l)
- $\text{Mg}^{2+}$  Concentration (mg/L)
- $\text{Ca}^{2+}$  Concentration (mg/L)
- $\text{SO}_4^{2-}$  (sulphate) Concentration (mg/L)
- Total Ions (mg/l)

**Geographic and climatic variables (GeoClim)**

- Latitude (decimal degrees)
- Altitude (m)
- Temperature Maximum in July ( $^{\circ}\text{C}$ )
- Annual Mean Temperature ( $^{\circ}\text{C}$ )
- Mean Temperature Warmest Quarter ( $^{\circ}\text{C}$ )

**Habitat properties (Habitat)**

- Surface Area (ha)
- Habitat Type (running, standing)

**(A) OTU richness**  
Residuals = 0.201

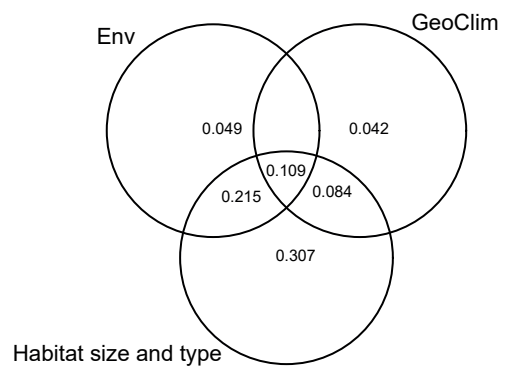

**(B) Shannon diversity index**  
Residuals = 0.394

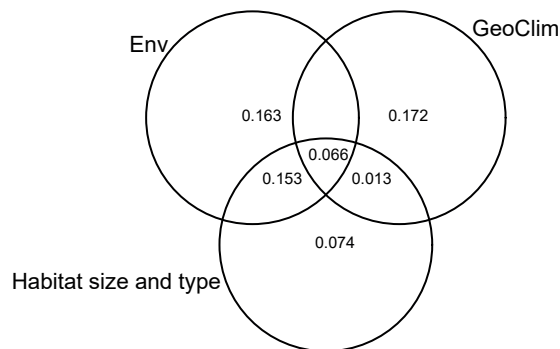

**(C) Bray-Curtis community dissimilarity**  
Residuals = 0.7571

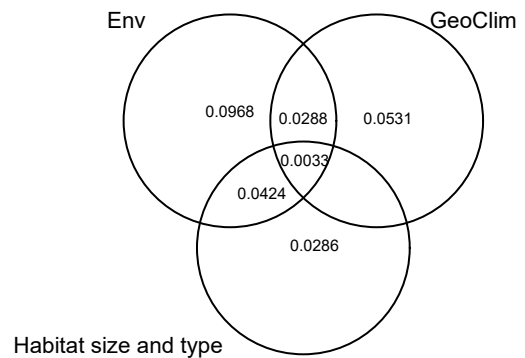

**Suppl. Mat. Fig. S5. Top**, pH of water samples and size of the investigated standing freshwater habitats (lakes, ponds and ditches). The line shows the result of a linear regression of the plotted data. **Bottom**, relationship of habitat size (surface area, hectar) and OTU richness determined by linear regression analyses. Because of the influence of pH on OTU richness (Fig. 6B), z values (slope) were determined by regressions for individual pH intervals of one pH unit, respectively. Only samples from standing waters were considered in this analysis. The obtained z values (slope of the relationship between surface area and OTU richness) are quite similar to the results previously reported by Reche et al. (2005) for entire bacterial communities ( $0.161 \pm 0.02$ , results based on DGGE data).

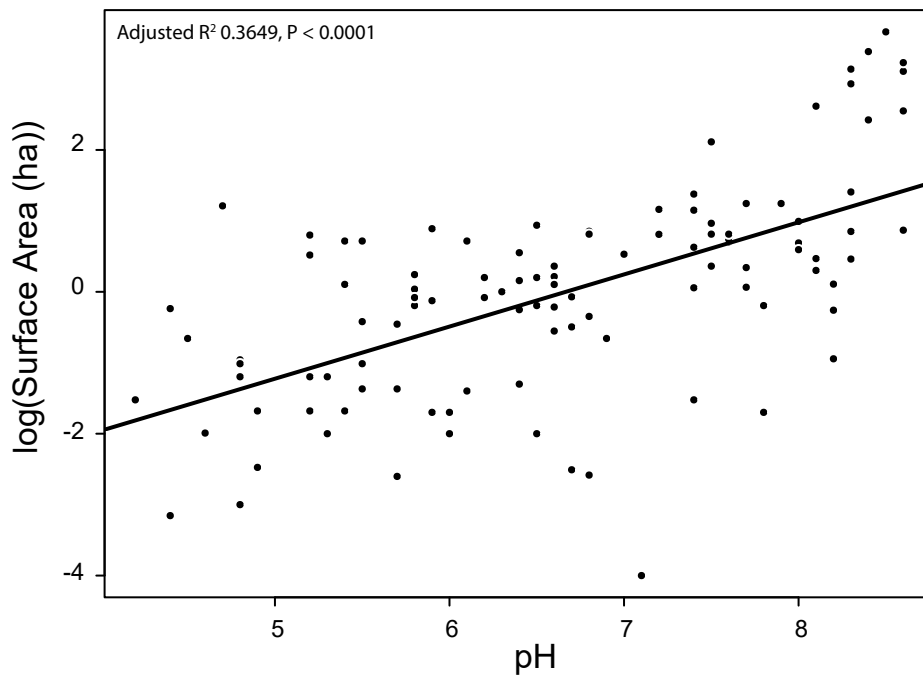

| pH_range  | N  | z      | Std Error (z) | adjusted R <sup>2</sup> | P value       | Comment                     |
|-----------|----|--------|---------------|-------------------------|---------------|-----------------------------|
| 4.0 - 5.0 | 10 |        |               | -0.0187                 | 0.3934        | no significant linear model |
| 4.5 - 5.5 | 20 |        |               | -0.0133                 | 0.4049        | no significant linear model |
| 5.0 - 6.0 | 23 | 0.1126 | 0.0448        | 0.1812                  | <b>0.0195</b> | *                           |
| 5.5 - 6.5 | 27 | 0.1492 | 0.0520        | 0.2050                  | <b>0.0079</b> | **                          |
| 6.0 - 7.0 | 27 | 0.1231 | 0.0508        | 0.1484                  | <b>0.0223</b> | *                           |
| 6.5 - 7.5 | 30 | 0.1162 | 0.0349        | 0.2458                  | <b>0.0023</b> | **                          |
| 7.0 - 8.0 | 25 | 0.1158 | 0.0355        | 0.2706                  | <b>0.0032</b> | **                          |
| 7.5 - 8.5 | 29 |        |               | 0.0626                  | 0.0937        | no significant linear model |

p < 0.05, \*  
p < 0.01, \*\*  
p < 0.001, \*\*\*

**z values statistics**

Average 0.123  
SD 0.015  
0.113 -  
Range 0.149

**Reference**

Reche, I., Pulido-Villena, E., Morales-Baquero, R., and E.O. Casamayor (2005) Does ecosystem size determine aquatic bacterial richness? Ecology 86 (7), 1715-1722

**Suppl. Mat. Fig. S6.** pH-related habitat occupancy of OTU. Occupancy refers to the percentage of habitats in a two pH unit range around the specific pH optimum of the respective OTU. For OTU with low and high  $\text{Ca}^{2+}$  preferences, habitat sets with low or high  $\text{Ca}^{2+}$  concentrations were considered, respectively. Only OTU with read numbers of  $>0.1\%$  of total read numbers were considered. **(A)** Box plots of occupancy of OTU assigned to different pH classes according to their respective pH optimum. **(B)** Relationship of occupancy of OTUs and the respectively observed maximum relative abundance of the OTUs. The color code separates the OTUs by their maximum relative abundance in the investigated samples in three different categories.

[A]

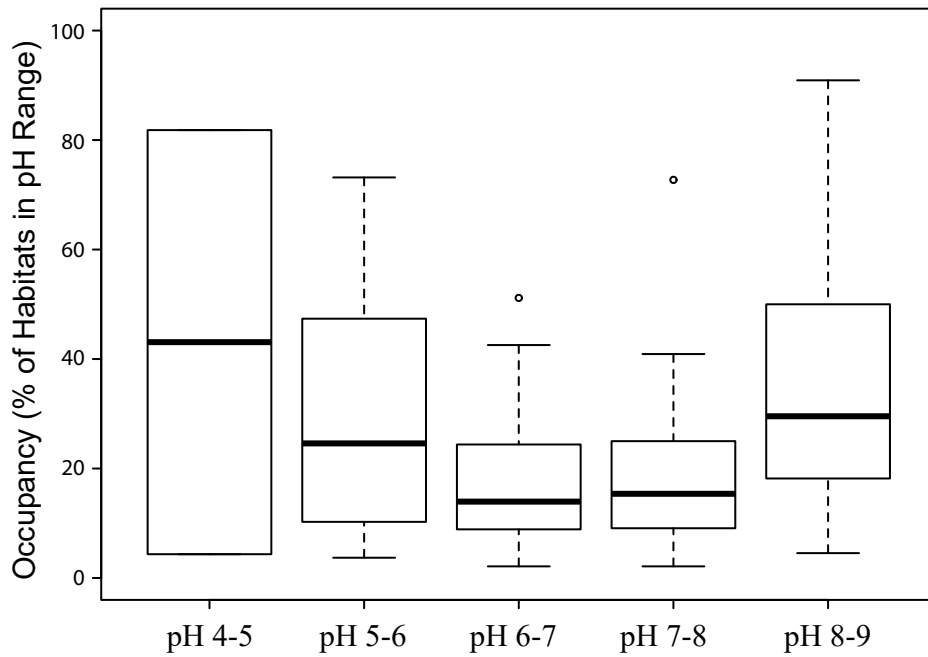

[B]

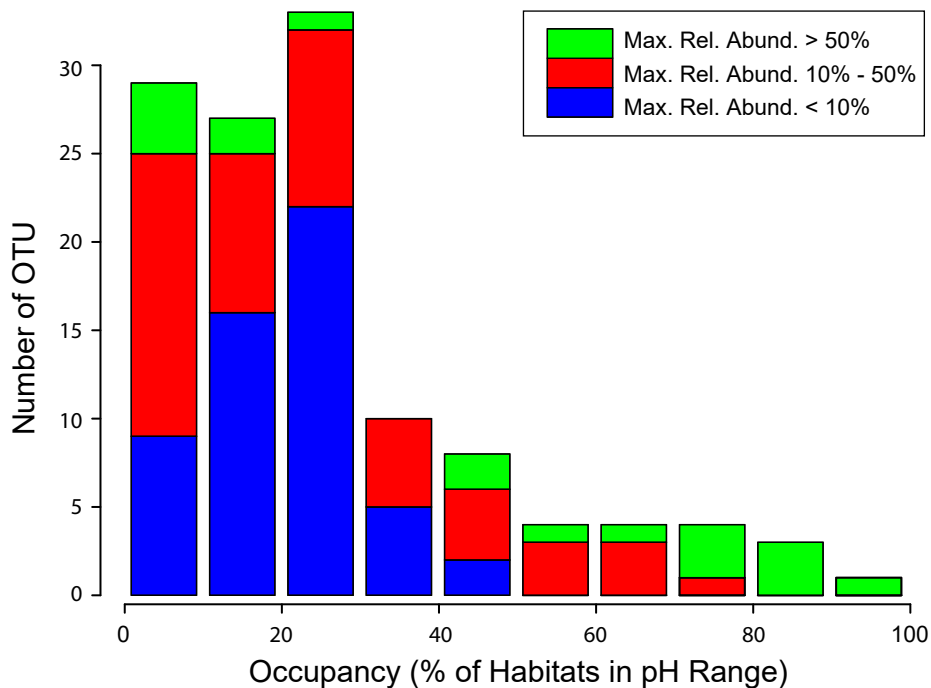



**Suppl. Mat. Table S2.** Reference strains, reference operational taxonomic units (refOTU, >98%) and environmental OTU (eOTU, >98%).

The term refOTU refers to OTU<sub>98%</sub> sharing with a cultured reference strain a priB sequence similarity of >98%. eOTU are OTU<sub>98%</sub>, which do not share with any cultured strain a priB sequence similarity >98%. The priB and genome accession numbers refer to the reference strains or reads mentioned in column 2. Reference OTU (refOTU) were named after one of the reference strains contained in the respective refOTU.

| #  | Reference Strain / read | OTU <sub>98%</sub> (refOTU or eOTU) | Polynucleobacter Subcluster | Lifestyle   | priB Accession Number | Genome Accession Number |
|----|-------------------------|-------------------------------------|-----------------------------|-------------|-----------------------|-------------------------|
| 1  | 15G-AUS-farblos         | AP-Tund2-400A-C3                    | PnecC                       | free-living | MT988562              | JACVOM000000000         |
| 2  | 30F-ANTBAC              | 30F-ANTBAC                          | PnecD                       | free-living | MT988563              | JACVON000000000         |
| 3  | 31A-FELB                | Species-Complex-4                   | PnecC                       | free-living | MT988564              | JACVOO00000000          |
| 4  | 71A-WALBACH             | 71A-WALBACH                         | PnecC                       | free-living | MT988565              | JACVOP000000000         |
| 5  | 73C-SIWE                | Species-Complex-6                   | PnecC                       | free-living | MT988566              | JACVOK000000000         |
| 6  | 78F-HAINBA              | Species-Complex-4                   | PnecC                       | free-living | MT988567              | JACVOQ000000000         |
| 7  | 80A-SIGWE               | 80A-SIGWE                           | PnecC                       | free-living | MT988568              | JACVOR000000000         |
| 8  | 86C-FISCH               | Species-Complex-1                   | PnecC                       | free-living | MT988569              | JACVOL000000000         |
| 9  | AM-25C3                 | AM-25C3                             | PnecC                       | free-living | MT988570              | JACVOS000000000         |
| 10 | AM-26B4                 | Species-Complex-5                   | PnecD                       | free-living | MT988571              | JACVOT000000000         |
| 11 | AM-7D1                  | MWH-T2W17                           | PnecC                       | free-living | MT988572              | CP061319                |
| 12 | AP-AinPum-20-C6         | Polynucleobacter paneuropaeus       | PnecC                       | free-living | MT988575              | JAANHG000000000         |
| 13 | AP-AinPum-60-G11        | AP-AinPum-60-G11                    | PnecC                       | free-living | MT988576              | CP061318                |
| 14 | AP-Basta-1000A-D1       | Species-Complex-7                   | PnecC                       | free-living | MT988577              | JACVOU000000000         |
| 15 | AP-Berg-20B-E5          | AP-Titi-500A-B4                     | PnecC                       | free-living | MT988578              |                         |
| 16 | AP-Blind-20-A3          | AP-Blind-20-A3                      | PnecC                       | free-living | MT988579              |                         |
| 17 | AP-Blind-40-E7          | AP-Blind-40-E7                      | PnecC                       | free-living | MT988580              |                         |
| 18 | AP-Cala-100A-B4         | AP-Cala-100A-B4                     | PnecC                       | free-living | MT988581              |                         |
| 19 | AP-Capit-er-40B-B5      | Species-Complex-1                   | PnecC                       | free-living | MT988582              |                         |
| 20 | AP-Creno-60-A2          | MWH-Svant-W18                       | PnecC                       | free-living | MT988583              |                         |
| 21 | AP-Elch-400A-B2         | Species-Complex-7                   | PnecC                       | free-living | MT988584              | CP061317                |
| 22 | AP-Feld-500A-C5         | UB-Siik-W21                         | PnecC                       | free-living | MT988585              |                         |
| 23 | AP-Galz2-40-E9          | Nonnen-W13                          | PnecC                       | free-living | MT988586              |                         |
| 24 | AP-Holl-20A-A1          | Nonnen-W13                          | PnecC                       | free-living | MT988587              |                         |
| 25 | AP-Holl-20A-D6          | Nonnen-W13                          | PnecC                       | free-living | MT988588              |                         |
| 26 | AP-Hunz-20-A2           | Polynucleobacter paneuropaeus       | PnecC                       | free-living | MT988589              | JAANGD000000000         |
| 27 | AP-lbm4-20-A2           | AP-lbm4-20-A2                       | PnecC                       | free-living | MT988590              |                         |
| 28 | AP-Inari4-20-E4         | MWH-Svant-W18                       | PnecC                       | free-living | MT988591              |                         |
| 29 | AP-Inari4-40-G4         | Polynucleobacter paneuropaeus       | PnecC                       | free-living | MT988592              | CP049645                |
| 30 | AP-Jannik-300A-C4       | MWH-T2W17                           | PnecC                       | free-living | MT988593              | CP061316                |
| 31 | AP-Kaivos-20-H2         | Species-Complex-1                   | PnecC                       | free-living | MT988594              | JACVOX000000000         |
| 32 | AP-Kolm-20A-A1          | Species-Complex-1                   | PnecC                       | free-living | MT988595              | CP061315                |
| 33 | AP-Latsch-80-C2         | AP-Latsch-80-C2                     | PnecC                       | free-living | MT988596              | JACVOY000000000         |
| 34 | AP-Melu-1000-A1         | Species-Complex-7                   | PnecC                       | free-living | MT988597              | CP061314                |
| 35 | AP-Melu-500A-A1         | AP-Melu-500A-A1                     | PnecC                       | free-living | MT988599              | JACVOZ000000000         |
| 36 | AP-Mumm-500A-B3         | AP-Mumm-500A-B3                     | PnecC                       | free-living | MT988600              | JACVPA000000000         |
| 37 | AP-Nickl2-20-E11        | Species-Complex-1                   | PnecC                       | free-living | MT988601              |                         |
| 38 | AP-Nino-20-F12-2016     | MWH-Svant-W18                       | PnecC                       | free-living | MT988602              |                         |
| 39 | AP-Nino-20-G2           | AP-Nino-20-G2                       | PnecC                       | free-living | MT988603              | CP061313                |
| 40 | AP-Nino2y-300C-B4       | AP-Nino2y-300C-B4                   | PnecC                       | free-living | MT988604              |                         |
| 41 | AP-NPozz3-10B-F9        | MG-52-Enon2-B4                      | PnecC                       | free-living | MT988605              |                         |
| 42 | AP-Odin-400C-A2         | Species-Complex-1                   | PnecC                       | free-living | MT988606              |                         |
| 43 | AP-Peces-20-D6          | Nonnen-W13                          | PnecC                       | free-living | MT988607              |                         |
| 44 | AP-Peces-20-F8          | Nonnen-W13                          | PnecC                       | free-living | MT988608              |                         |
| 45 | AP-Rama-100A-F3         | MG-5-Ahmo-C2                        | PnecC                       | free-living | MT988609              |                         |
| 46 | AP-Reno-20A-C10         | Species-Complex-1                   | PnecC                       | free-living | MT988610              |                         |
| 47 | AP-RePozz3-20B-H2       | AP-Nino-20-G2                       | PnecC                       | free-living | MT988611              |                         |
| 48 | AP-Roav5-40-G5          | Polynucleobacter paneuropaeus       | PnecC                       | free-living | MT988612              | CP049637                |
| 49 | AP-Rub-40A-C1           | Species-Complex-1                   | PnecC                       | free-living | MT988613              |                         |
| 50 | AP-SaBe1-20-E8          | Species-Complex-1                   | PnecC                       | free-living | MT988614              |                         |
| 51 | AP-Spelu-300-2          | AP-Spelu-300-2                      | PnecC                       | free-living | MT988615              |                         |
| 52 | AP-Stechi-80A-B1        | MG-5-Ahmo-C2                        | PnecC                       | free-living | MT988616              |                         |
| 53 | AP-Stier-20B-B4         | Nonnen-W13                          | PnecC                       | free-living | MT988617              |                         |
| 54 | AP-Stier-20B-C3         | Nonnen-W13                          | PnecC                       | free-living | MT988618              |                         |
| 55 | AP-Sving-400A-A2        | Species-Complex-7                   | PnecC                       | free-living | MT988619              | CP061312                |
| 56 | AP-Titi-500A-B4         | AP-Titi-500A-B4                     | PnecC                       | free-living | MT988620              | CP061311                |
| 57 | AP-Titi-500C-D3         | AP-Titi-500C-D3                     | PnecC                       | free-living | MT988621              |                         |
| 58 | AP-Tund2-400A-C3        | AP-Tund2-400A-C3                    | PnecC                       | free-living | MT988622              |                         |
| 59 | AP-UKlaffer2-1000-D2    | Species-Complex-7                   | PnecC                       | free-living | MT988623              |                         |
| 60 | AP-Windg-500B-B2        | AP-Windg-500B-B2                    | PnecC                       | free-living | MT988624              |                         |
| 61 | CB                      | Ross2-W14                           | PnecC                       | free-living | MT988625              |                         |
| 62 | Creno-II-W23            | MG-5-Ahmo-C2                        | PnecC                       | free-living | MT988626              |                         |
| 63 | Creno-IV-W18            | UB-Siik-W21                         | PnecC                       | free-living | MT988627              |                         |
| 64 | Creno-I-W12             | Nonnen-W13                          | PnecC                       | free-living | MT988628              |                         |
| 65 | CS-Geat-B5              | Species-Complex-7                   | PnecC                       | free-living | MT988629              |                         |
| 66 | CS-Geat-D5              | JS-Mosq-20-D10                      | PnecC                       | free-living | MT988630              |                         |
| 67 | CS-Kong-C6              | Species-Complex-1                   | PnecC                       | free-living | MT988631              |                         |
| 68 | CS-Odin-A6              | CS-Odin-A6                          | PnecC                       | free-living | MT988632              | JACVPD000000000         |
| 69 | CS-Skans-A4             | Species-Complex-1                   | PnecC                       | free-living | MT988633              |                         |
| 70 | CS-Slettfy-B6           | Species-Complex-7                   | PnecC                       | free-living | MT988634              |                         |
| 71 | CS-Slettfy-D4           | Species-Complex-1                   | PnecC                       | free-living | MT988635              |                         |

|     |                         |                               |       |              |          |                 |
|-----|-------------------------|-------------------------------|-------|--------------|----------|-----------------|
| 72  | czRimov8-C6             | Species-Complex-4             | PnecC | free-living  | MT988636 |                 |
| 73  | Diet-1                  | Species-Complex-1             | PnecC | free-living  | MT988637 |                 |
| 74  | Endosymbiont-Fsp1-4     | Endosymbiont-Fsp1-4           | PnecC | Endosymbiont | MT988638 | LT615227        |
| 75  | Endosymbiont-PPGSP-Eae1 | Endosymbiont-PPGSP-Eae1       | PnecC | Endosymbiont | MT988639 | LT615228        |
| 76  | Endosymbiont-PPGSP-Eae2 | Endosymbiont-PPGSP-Eae2       | PnecC | Endosymbiont | MT988640 | LT606947        |
| 77  | Endosymbiont-PPGSP-Eae3 | Endosymbiont-PPGSP-Eae3       | PnecC | Endosymbiont | MT988641 | LT606948        |
| 78  | Endosymbiont-PPGSP-Eae5 | Endosymbiont-DACHS-Sophie     | PnecC | Endosymbiont | MT988642 | LT606950        |
| 79  | Endosymbiont-PPGSP-Eda1 | Endosymbiont-Alex-Bettina     | PnecC | Endosymbiont | MT988643 | LT606946        |
| 80  | Endosymbiont-PPGSP-Eoc1 | Endosymbiont-PPGSP-Eoc1       | PnecC | Endosymbiont | MT988644 | LT606951        |
| 81  | Endosymbiont-PPGSP-Ewo1 | Endosymbiont-PPGSP-Ewo1       | PnecC | Endosymbiont | MT988645 | LT606949        |
| 82  | es-EL-1                 | es-EL-1                       | PnecC | free-living  | MT988646 | CP061310        |
| 83  | es-GGE-1                | UB-Siik-W21                   | PnecC | free-living  | MT988647 | JACVPE000000000 |
| 84  | es-MAR-1                | Species-Complex-4             | PnecC | free-living  | MT988648 |                 |
| 85  | es-MAR-2                | Species-Complex-1             | PnecC | free-living  | MT988649 | CP061309        |
| 86  | es-MAR-3                | es-MAR-3                      | PnecC | free-living  | MT988650 |                 |
| 87  | es-MAR-4                | es-MAR-4                      | PnecC | free-living  | MT988651 | JACVPF000000000 |
| 88  | Eve-W11                 | Eve-W11                       | PnecC | free-living  | MT988652 |                 |
| 89  | FNE-F8-bin-6-1-PnecC    | FNE-F8-FUKU                   | PnecC | free-living  | MT988653 |                 |
| 90  | Fuers-14                | Species-Complex-1             | PnecC | free-living  | MT988654 | JACVPG000000000 |
| 91  | FUKU-SE-14              | AP-Windg-500B-B2              | PnecC | free-living  | MT988655 |                 |
| 92  | FUKU-SE-20              | FUKU-SE-20                    | PnecC | free-living  | MT988656 |                 |
| 93  | Galti-A-W1              | Galti-A-W1                    | PnecC | free-living  | MT988657 |                 |
| 94  | GWA2-45-21              | Species-Complex-4             | PnecC | free-living  | MT988658 |                 |
| 95  | JS-Aci1-20-B10          | Polynucleobacter paneuropaeus | PnecC | free-living  | MT988659 | CP049628        |
| 96  | JS-Fieb-80-E5           | Species-Complex-1             | PnecC | free-living  | MT988660 | JACVPH000000000 |
| 97  | JS-Hess-40-B12          | JS-Hess-40-B12                | PnecC | free-living  | MT988661 |                 |
| 98  | JS-JIR24-3-B2           | UB-Siik-W21                   | PnecC | free-living  | MT988662 |                 |
| 99  | JS-JIR-5-A7             | UB-Siik-W21                   | PnecC | free-living  | MT988663 | CP061308        |
| 100 | JS-Jiri-2-F12           | AP-AinPum-60-G11              | PnecC | free-living  | MT988664 |                 |
| 101 | JS-JIR-I-a15            | JS-JIR-I-a15                  | PnecC | free-living  | MT988665 |                 |
| 102 | JS-JIR-I-c6             | Galti-A-W1                    | PnecC | free-living  | MT988666 |                 |
| 103 | JS-JIR-II-b4            | Species-Complex-1             | PnecC | free-living  | MT988667 | CP061306        |
| 104 | JS-JIR-II-c15           | Galti-A-W1                    | PnecC | free-living  | MT988668 |                 |
| 105 | JS-JIR-III-a17          | JS-JIR-III-a17                | PnecC | free-living  | MT988669 |                 |
| 106 | JS-JIR-III-b11          | Species-Complex-1             | PnecC | free-living  | MT988670 |                 |
| 107 | JS-Kajja-80-A5          | Species-Complex-2             | PnecC | free-living  | MT988671 |                 |
| 108 | JS-Mosq-20-D10          | JS-Mosq-20-D10                | PnecC | free-living  | MT988672 | CP061305        |
| 109 | JS-Mosq-20-F4           | UB-Siik-W21                   | PnecC | free-living  | MT988673 |                 |
| 110 | JS-Polo-80-F4           | Species-Complex-1             | PnecC | free-living  | MT988674 | JACVPI000000000 |
| 111 | JS-Safj-400b-B2         | Species-Complex-1             | PnecC | free-living  | MT988675 | JACVPJ000000000 |
| 112 | JS-Stech1-80-C2         | Species-Complex-2             | PnecC | free-living  | MT988676 |                 |
| 113 | JS-Tund1-600a-C4        | JS-Tund1-600a-C4              | PnecC | free-living  | MT988677 |                 |
| 114 | JS-Ukon-20-H6           | Species-Complex-1             | PnecC | free-living  | MT988678 |                 |
| 115 | JS-Vitta2-80-B10        | Species-Complex-2             | PnecC | free-living  | MT988679 |                 |
| 116 | Klost2-W16              | Species-Complex-1             | PnecC | free-living  | MT988680 |                 |
| 117 | Landm-A-W12             | Landm-A-W12                   | PnecC | free-living  | MT988681 |                 |
| 118 | Latsch14-1              | Latsch14-1                    | PnecC | free-living  | MT988682 |                 |
| 119 | MG-27-Goln-C1           | Galti-A-W1                    | PnecC | free-living  | MT988685 | JACVPM000000000 |
| 120 | MG-27-Goln-C3           | MG-27-Goln-C3                 | PnecC | free-living  | MT988686 |                 |
| 121 | MG-42-Nopo-D3           | Species-Complex-7             | PnecC | free-living  | MT988687 |                 |
| 122 | MG-43-Slet-D2           | MG-43-Slet-D2                 | PnecC | free-living  | MT988688 |                 |
| 123 | MG-43-Slet-F1           | MG-43-Slet-F1                 | PnecC | free-living  | MT988689 |                 |
| 124 | MG-4-Mela-E1            | QLW-P1DATA-2                  | PnecC | free-living  | MT988690 |                 |
| 125 | MG-4-Mela-F2            | AP-Blind-20-A3                | PnecC | free-living  | MT988691 |                 |
| 126 | MG-52-Enon2-B4          | MG-52-Enon2-B4                | PnecC | free-living  | MT988692 |                 |
| 127 | MG-58-Narv-B1           | MG-52-Enon2-B4                | PnecC | free-living  | MT988693 |                 |
| 128 | MG-5-Ahmo-C2            | MG-5-Ahmo-C2                  | PnecC | free-living  | MT988694 | CP061304        |
| 129 | MG-63-Kera-F1           | MG-63-Kera-F1                 | PnecC | free-living  | MT988695 |                 |
| 130 | MG-65-Swed-E4           | Species-Complex-1             | PnecC | free-living  | MT988696 |                 |
| 131 | MG-7-Harju-B2           | MG-52-Enon2-B4                | PnecC | free-living  | MT988697 |                 |
| 132 | MG-Unter2-18            | Species-Complex-3             | PnecC | free-living  | MT988698 | CP061302        |
| 133 | MWH-Adler-W8            | Species-Complex-1             | PnecC | free-living  | MT988700 | LZFI000000000   |
| 134 | MWH-Aito-300-X1         | Species-Complex-1             | PnecC | free-living  | MT988701 |                 |
| 135 | MWH-Aito-300-X4         | Galti-A-W1                    | PnecC | free-living  | MT988702 |                 |
| 136 | MWH-Aus1W21             | AP-Spelu-300-2                | PnecC | free-living  | MT988703 |                 |
| 137 | MWH-Aus1W7              | Species-Complex-1             | PnecC | free-living  | MT988704 |                 |
| 138 | MWH-Berg-3C6            | MWH-Berg-3C6                  | PnecC | free-living  | MT988705 | JACVPN000000000 |
| 139 | MWH-Braz-FAM2G          | MWH-Braz-FAM2G                | PnecC | free-living  | MT988706 | CP061300        |
| 140 | MWH-Braz-FAM2Ja2        | MWH-Braz-FAM2Ja2              | PnecC | free-living  | MT988707 |                 |
| 141 | MWH-Braz-FAM4A          | MWH-Braz-FAM4A                | PnecC | free-living  | MT988708 |                 |
| 142 | MWH-CaK5                | Species-Complex-5             | PnecD | free-living  | MT988709 | CP061299        |
| 143 | MWH-Creno-3A4           | MWH-Svant-W18                 | PnecC | free-living  | MT988710 | JACXSA000000000 |
| 144 | MWH-Creno-4B5           | Species-Complex-1             | PnecC | free-living  | MT988711 |                 |
| 145 | MWH-EgelM2-3            | Species-Complex-6             | PnecC | free-living  | MT988713 |                 |
| 146 | MWH-Hall2               | Species-Complex-6             | PnecC | free-living  | MT988715 |                 |
| 147 | MWH-Hall5               | MWH-Hall5                     | PnecC | free-living  | MT988716 |                 |
| 148 | MWH-HuK1                | MWH-HuK1                      | PnecC | free-living  | MT988717 | JACVPP000000000 |
| 149 | MWH-Jannik1A5           | MWH-Jannik1A5                 | PnecC | free-living  | MT988720 | JACVPQ000000000 |
| 150 | MWH-Jannik3A3           | MWH-T2W17                     | PnecC | free-living  | MT988721 |                 |
| 151 | MWH-Jannik3D5           | Polynucleobacter yangtzensis  | PnecC | free-living  | MT988722 |                 |
| 152 | MWH-K35W1               | Polynucleobacter aenigmaticus | PnecC | free-living  | MT988723 | NGU000000000    |
| 153 | MWH-Lacke-12-2          | Species-Complex-1             | PnecC | free-living  | MT988724 |                 |

|     |                                    |                                       |        |              |          |                 |
|-----|------------------------------------|---------------------------------------|--------|--------------|----------|-----------------|
| 154 | MWH-Lett3-08W15                    | Species-Complex-1                     | PnecC  | free-living  | MT988725 |                 |
| 155 | MWH-LF2-54b                        | MWH-LF2-54b                           | PnecC  | free-living  | MT988726 |                 |
| 156 | MWH-Loch1C5                        | MWH-Loch1C5                           | PnecD  | free-living  | MT988727 | JACVPR000000000 |
| 157 | MWH-Mekk-B1                        | MWH-Mekk-B1                           | PnecC  | free-living  | MT988728 | JACVPS000000000 |
| 158 | MWH-Mekk-C3                        | Species-Complex-2                     | PnecC  | free-living  | MT988729 | CP061298        |
| 159 | MWH-Mlynsky-W10                    | Nonnen-W13                            | PnecC  | free-living  | MT988730 |                 |
| 160 | MWH-Molso1                         | MWH-Molso1                            | PnecC  | free-living  | MT988731 | CP061297        |
| 161 | MWH-MoK7                           | MWH-MoK7                              | PnecC  | free-living  | MT988734 |                 |
| 162 | MWH-NZ4W10                         | AP-AinPum-60-G11                      | PnecC  | free-living  | MT988735 |                 |
| 163 | MWH-NZ4W4                          | Species-Complex-4                     | PnecC  | free-living  | MT988736 |                 |
| 164 | MWH-NZ4W7a                         | Nonnen-W13                            | PnecC  | free-living  | MT988737 |                 |
| 165 | MWH-NZ7W17                         | Species-Complex-4                     | PnecC  | free-living  | MT988738 |                 |
| 166 | MWH-P3-07-1                        | Species-Complex-2                     | PnecC  | free-living  | MT988739 | CP061296        |
| 167 | MWH-PoolBr-B5                      | Species-Complex-1                     | PnecC  | free-living  | MT988740 |                 |
| 168 | MWH-RechtKol4                      | Polynucleobacter asymbioticus amplus  | PnecC  | free-living  | MT988574 | CP015017        |
| 169 | MWH-S4W17                          | Species-Complex-1                     | PnecC  | free-living  | MT988742 | CP061295        |
| 170 | MWH-Salz1-W7                       | JS-JIR-I-a15                          | PnecC  | free-living  | MT988743 |                 |
| 171 | MWH-Spelu-300-X3                   | MWH-Spelu-300-X3                      | PnecD  | free-living  | MT988744 |                 |
| 172 | MWH-Svant-W18                      | MWH-Svant-W18                         | PnecC  | free-living  | MT988745 | CP061293        |
| 173 | MWH-T1W11                          | MWH-T2W17                             | PnecC  | free-living  | MT988746 |                 |
| 174 | MWH-T2W17                          | MWH-T2W17                             | PnecC  | free-living  | MT988747 |                 |
| 175 | MWH-Teich-2B6                      | Species-Complex-1                     | PnecC  | free-living  | MT988748 |                 |
| 176 | MWH-UH11A                          | MWH-HuK1                              | PnecC  | free-living  | MT988749 |                 |
| 177 | MWH-UH14B                          | MWH-UH14B                             | PnecC  | free-living  | MT988750 |                 |
| 178 | MWH-UH14E                          | MWH-UH2A                              | PnecC  | free-living  | MT988751 |                 |
| 179 | MWH-UH19D                          | MWH-UH14B                             | PnecC  | free-living  | MT988752 |                 |
| 180 | MWH-UH21F                          | MWH-UH21F                             | PnecC  | free-living  | MT988754 |                 |
| 181 | MWH-UH21G                          | MWH-UH21G                             | PnecC  | free-living  | MT988755 |                 |
| 182 | MWH-UH23A                          | MWH-UH23A                             | PnecC  | free-living  | MT988756 |                 |
| 183 | MWH-UH23C                          | AP-Spelu-300-2                        | PnecC  | free-living  | MT988757 |                 |
| 184 | MWH-UH24A                          | MWH-UH24A                             | PnecB2 | free-living  | MT988758 | CP061292        |
| 185 | MWH-UH25C                          | MWH-UH21B                             | PnecC  | free-living  | MT988759 |                 |
| 186 | MWH-UH25E                          | MWH-UH25E                             | PnecC  | free-living  | MT988760 |                 |
| 187 | MWH-UH2A                           | MWH-UH2A                              | PnecC  | free-living  | MT988761 |                 |
| 188 | MWH-UH35A                          | MWH-UH35A                             | PnecC  | free-living  | MT988762 |                 |
| 189 | MWH-UH36A                          | MWH-UH14B                             | PnecC  | free-living  | MT988763 |                 |
| 190 | MWH-UH38A                          | Species-Complex-1                     | PnecC  | free-living  | MT988764 |                 |
| 191 | MWH-UH38CKI                        | MWH-UH38CKI                           | PnecC  | free-living  | MT988765 |                 |
| 192 | MWH-UK1W16                         | Polynucleobacter paneuropaeus         | PnecC  | free-living  | MT988766 | QMGCG000000000  |
| 193 | Nino-II-W8                         | MWH-Svant-W18                         | PnecC  | free-living  | MT988769 |                 |
| 194 | Nino-IV-W14                        | Nonnen-W13                            | PnecC  | free-living  | MT988770 |                 |
| 195 | Nonnen-W13                         | Nonnen-W13                            | PnecC  | free-living  | MT988771 | JACVPU000000000 |
| 196 | Nonnen-W15                         | UB-Siik-W21                           | PnecC  | free-living  | MT988772 |                 |
| 197 | MWH-PoolGreenA3                    | Polynucleobacter acidiphobus          | PnecB2 | free-living  | MT988741 | CP023277        |
| 198 | LimPoW16                           | LimPoW16                              | PnecC  | free-living  | MT988683 | CP028941        |
| 199 | UK-Long2-W17                       | UK-Long2-W17                          | PnecC  | free-living  | MT988803 | CP028940        |
| 200 | QLW-P1DMWA-1                       | Polynucleobacter asymbioticus simplex | PnecC  | free-living  | MT988781 | CP000655        |
| 201 | MWH-Feld-100                       | Polynucleobacter campilacus           | PnecC  | free-living  | MT988714 | NGUP000000000   |
| 202 | MWH-Molso2                         | Species-Complex-5                     | PnecD  | free-living  | MT988732 | NJGG000000000   |
| 203 | AM-8B5                             | Polynucleobacter difficilis           | PnecB1 | free-living  | MT988573 | CP023276        |
| 204 | MWH-MoK4                           | Species-Complex-3                     | PnecC  | free-living  | MT988733 | CP007501        |
| 205 | MWH-EgelM1-30-B4                   | Species-Complex-6                     | PnecC  | free-living  | MT988712 | NAIA000000000   |
| 206 | AP-Melu-1000-B4                    | Polynucleobacter meluiroseus          | PnecC  | free-living  | MT988598 | OANS000000000   |
| 207 | STIR1 (Endosymbiont)               | Polynucleobacter necessarius          | PnecC  | Endosymbiont | MT988784 | NC_010531       |
| 208 | MG-25-Pas1-D2                      | Polynucleobacter paneuropaeus         | PnecC  | free-living  | MT988684 | CP030085        |
| 209 | MT-CBb6A5                          | Polynucleobacter rarus                | PnecA  | free-living  | MT988699 | NTGB000000000   |
| 210 | MWH-HuW1                           | Polynucleobacter sinensis             | PnecC  | free-living  | MT988718 | LOJJ000000000   |
| 211 | MWH-Weng1-1                        | Polynucleobacter sphagniphilus        | PnecC  | free-living  | MT988768 | MPIY000000000   |
| 212 | MWH-UH21B                          | MWH-UH21B                             | PnecC  | free-living  | MT988753 | CP028942        |
| 213 | MWH-VikM1                          | Polynucleobacter victoriensis         | PnecD  | free-living  | MT988767 |                 |
| 214 | QLW-P1FAT50C-4                     | Polynucleobacter wuianus              | PnecC  | free-living  | MT988774 | CP015922        |
| 215 | MWH-JaK3                           | Polynucleobacter yangtzensis          | PnecC  | free-living  | MT988719 | LOJII000000000  |
| 216 | QLW-P1DATA-2                       | QLW-P1DATA-2                          | PnecC  | free-living  | MT988773 | LZMQ000000000   |
| 217 | QLW-P2FAT50C-1                     | AP-Blind-20-A3                        | PnecC  | free-living  | MT988775 |                 |
| 218 | Ross1-W21                          | Species-Complex-1                     | PnecC  | free-living  | MT988776 |                 |
| 219 | Ross1-W9                           | Species-Complex-1                     | PnecC  | free-living  | MT988777 | JACVPW000000000 |
| 220 | Ross2-W14                          | Ross2-W14                             | PnecC  | free-living  | MT988778 |                 |
| 221 | Ross6-W10                          | Ross6-W10                             | PnecC  | free-living  | MT988779 |                 |
| 222 | SCGC-AAA027-C02                    | ncmg                                  | PnecC  | free-living  | MT988780 |                 |
| 223 | SM1-W1                             | Species-Complex-1                     | PnecC  | free-living  | MT988782 |                 |
| 224 | SP-AinPum-045-mR2A-3A              | Species-Complex-1                     | PnecC  | free-living  | MT988783 |                 |
| 225 | Tro7-14-1                          | Latsch14-1                            | PnecC  | free-living  | MT988785 |                 |
| 226 | Tro8-14-1                          | Species-Complex-1                     | PnecC  | free-living  | MT988786 | JACVPX000000000 |
| 227 | Tro8F10W12                         | Species-Complex-1                     | PnecC  | free-living  | MT988787 |                 |
| 228 | Trout-Bog-Hypolimnion-pan-assembly | Trout-Bog                             | PnecC  | free-living  | MT988788 |                 |
| 229 | TSB-Sco08W16                       | TSB-Sco08W16                          | PnecC  | free-living  | MT988789 | CP061291        |
| 230 | TSB-Sco09W6                        | MG-5-Ahmo-C2                          | PnecC  | free-living  | MT988790 |                 |
| 231 | UB-Chica-W24                       | LimPoW16                              | PnecC  | free-living  | MT988791 |                 |
| 232 | UB-Domo-W1                         | UB-Domo-W1                            | PnecC  | free-living  | MT988792 | PGTX000000000   |
| 233 | UB-Kamb-W5                         | MWH-UH14B                             | PnecC  | free-living  | MT988793 |                 |
| 234 | UB-Kamb-W7a                        | UB-Kamb-W7a                           | PnecC  | free-living  | MT988794 |                 |
| 235 | UB-Kamb-W7b                        | UB-Kamb-W7b                           | PnecC  | free-living  | MT988795 |                 |



|     |                                   |                   |       |             |          |                 |
|-----|-----------------------------------|-------------------|-------|-------------|----------|-----------------|
| 236 | UB-Piko-W3                        | UB-Piko-W3        | PnecC | free-living | MT988796 | JACVPY000000000 |
| 237 | UB-Siik-W21                       | UB-Siik-W21       | PnecC | free-living | MT988797 | CP061289        |
| 238 | UB-Somero-W24                     | UB-Domo-W1        | PnecC | free-living | MT988798 |                 |
| 239 | UB-Tiil-W10                       | Species-Complex-1 | PnecC | free-living | MT988799 | JACVPZ000000000 |
| 240 | UK3W23Kol1                        | UK3W23Kol1        | PnecC | free-living | MT988800 |                 |
| 241 | UK-Gri1-W3                        | Species-Complex-1 | PnecC | free-living | MT988801 | JACVQA000000000 |
| 242 | UK-Kesae-W10                      | UK-Kesae-W10      | PnecC | free-living | MT988802 | JACVQB000000000 |
| 243 | UK-Mo-2m-Kol15                    | UK-Mo-2m-Kol15    | PnecC | free-living | MT988804 | JACVQC000000000 |
| 244 | UK-Mo-2m-Kol30                    | UK-Mo-2m-Kol30    | PnecC | free-living | MT988805 |                 |
| 245 | UK-Piela-W13                      | UB-Siik-W21       | PnecC | free-living | MT988806 |                 |
| 246 | UK-Piela-W22                      | UK-Piela-W22      | PnecC | free-living | MT988807 |                 |
| 247 | UK-Pondora-W13                    | UK-Pondora-W13    | PnecC | free-living | MT988808 |                 |
| 248 | UK-Pondora-W15                    | UK-Pondora-W15    | PnecC | free-living | MT988809 | JACVQD000000000 |
| 249 | UK-Ruja-W24                       | UB-Siik-W21       | PnecC | free-living | MT988810 |                 |
| 250 | UK-Tiil2-W2                       | Species-Complex-1 | PnecC | free-living | MT988811 |                 |
| 251 | VK13                              | VK13              | PnecA | free-living | MT988812 |                 |
| 252 | VK25                              | Species-Complex-1 | PnecC | free-living | MT988813 | CP061288        |
| 253 | VK50                              | Species-Complex-1 | PnecC | free-living | MT988814 |                 |
| 254 | VK65                              | Species-Complex-1 | PnecC | free-living | MT988815 |                 |
| 255 | 687f09b49fb046710dcb0ea04b0389f5  | eOTU0001          | PnecC |             | MT988816 |                 |
| 256 | c12c0dce79d78b6b14a5993834635788  | eOTU0002          | PnecC |             | MT988817 |                 |
| 257 | a3827ec34e720937162779a2fb9d8d2c  | eOTU0003          | PnecC |             | MT988818 |                 |
| 258 | c57b74085a9d509d8ace347885dfce3   | eOTU0004          | PnecC |             | MT988819 |                 |
| 259 | e75ca2ee70a42d31fe76e0492e6f6ea6d | eOTU0005          | PnecC |             | MT988820 |                 |
| 260 | f8d7757735b57c9f0d7798b31271a266  | eOTU0006          | PnecC |             | MT988821 |                 |
| 261 | 5a007b457d79197af6570f93f28f88ed  | eOTU0007          | PnecC |             | MT988822 |                 |
| 262 | 262821f7ed7a71ee2c5c07de27f62f5e  | eOTU0008          | PnecC |             | MT988823 |                 |
| 263 | 3c2ba3a1bcb631c26a1a6bfc74ef917f  | eOTU0009          | PnecC |             | MT988824 |                 |
| 264 | 4a68c44f9ff1a403a995945112b1b9e1  | eOTU0010          | PnecC |             | MT988825 |                 |
| 265 | 42cd91fb135df2aeb0fd4a19e41aa35c  | eOTU0011          | PnecC |             | MT988826 |                 |
| 266 | 2326290d523535efaa199246d0da1076  | eOTU0012          | PnecC |             | MT988827 |                 |
| 267 | c220ba572ceccdd05b909a772e1e10b5  | eOTU0013          | PnecC |             | MT988828 |                 |
| 268 | 553de0ab7280e01d0b2486236990a86d  | eOTU0014          | PnecC |             | MT988829 |                 |
| 269 | 7a066b8faa8fe0a701cb411bdcb032a0  | eOTU0015          | PnecC |             | MT988830 |                 |
| 270 | bace9c36c82bb1eb9825dadcb99285ee  | eOTU0016          | PnecC |             | MT988831 |                 |
| 271 | 090607ee7a3acde99e757d2b7f77d95   | eOTU0017          | PnecC |             | MT988832 |                 |
| 272 | a645c9aedda824d508a0a04735af4748  | eOTU0018          | PnecC |             | MT988833 |                 |
| 273 | af2832af6cdec4bc717425e04f45349f7 | eOTU0019          | PnecC |             | MT988834 |                 |
| 274 | 6937b407d678cb0f8b85e4fd7cccc4886 | eOTU0020          | PnecC |             | MT988835 |                 |
| 275 | ab3f1e417f495ef97423e70d92378326  | eOTU0021          | PnecC |             | MT988836 |                 |
| 276 | a2a7a1853abe7aa83307631d46c6eb05b | eOTU0022          | PnecC |             | MT988837 |                 |
| 277 | 58d617cd537617465217614435c87199  | eOTU0023          | PnecC |             | MT988838 |                 |
| 278 | fcabf9885aedccf231ebb05bcfa2a37   | eOTU0024          | PnecC |             | MT988839 |                 |
| 279 | 1b7ef7152aacfea74b135ee3330cc22c  | eOTU0025          | PnecC |             | MT988840 |                 |
| 280 | 204a86feae61b05bf5af39af4085614e  | eOTU0026          | PnecC |             | MT988841 |                 |
| 281 | 0f2dc8409a7be84565a5f82c318753ab  | eOTU0027          | PnecC |             | MT988842 |                 |
| 282 | f55f49b14c3c97ac59c0fed99364df00  | eOTU0028          | PnecC |             | MT988843 |                 |
| 283 | b9374496f82af5aa3ed09d946aa24ec2  | eOTU0029          | PnecC |             | MT988844 |                 |
| 284 | c36a83a181672b1059dd0a28dd9247f   | eOTU0030          | PnecC |             | MT988845 |                 |
| 285 | a4f9499cbe24918d7af334fce57ecc54  | eOTU0031          | PnecC |             | MT988846 |                 |
| 286 | 52b6324d2305b1a5661daef61c1f473d  | eOTU0032          | PnecC |             | MT988847 |                 |
| 287 | 393fc12371babae3421646d47ed56cc   | eOTU0033          | PnecC |             | MT988848 |                 |
| 288 | 606d84607c16ad6f6f6c27c7d4bb98f7  | eOTU0034          | PnecC |             | MT988849 |                 |
| 289 | 7a829642098c2ffc094b271c62feaa9   | eOTU0035          | PnecC |             | MT988850 |                 |
| 290 | 81f0152d40b637b046e217159cf36098  | eOTU0036          | PnecC |             | MT988851 |                 |
| 291 | feac96371c6c3f53790417e695b0d38f  | eOTU0037          | PnecC |             | MT988852 |                 |
| 292 | cc984779219d2c4b565ae0a0335550    | eOTU0038          | PnecC |             | MT988853 |                 |
| 293 | c643918e5dc8e9ff816a77fc7d211f73  | eOTU0039          | PnecC |             | MT988854 |                 |
| 294 | 12886d08348e0a54faec97959cd1d81c  | eOTU0040          | PnecC |             | MT988855 |                 |
| 295 | 1cf6ef8f13e0d123b658dc22696f0d7a  | eOTU0041          | PnecC |             | MT988856 |                 |
| 296 | 8cd9b0454a0b34c0fa34272cc360ae47  | eOTU0042          | PnecC |             | MT988857 |                 |
| 297 | dd3e6ca1a1b274440478aa01ab853faf  | eOTU0043          | PnecC |             | MT988858 |                 |
| 298 | 2824da5329061c7f0dff81e18e13101   | eOTU0044          | PnecC |             | MT988859 |                 |
| 299 | 4025f5d3f3ed700691eae097e8c8c6b   | eOTU0045          | PnecC |             | MT988860 |                 |
| 300 | a1d55caf149d24b69b23d59d9e6db3cb  | eOTU0046          | PnecC |             | MT988861 |                 |
| 301 | 9e0a181e1701246e9e4f064ec0032df4  | eOTU0047          | PnecC |             | MT988862 |                 |
| 302 | d7746e0f0c31d834ec0a8f006105a1e0  | eOTU0048          | PnecC |             | MT988863 |                 |
| 303 | 228187e4866b8d671ac873d552c6f2b9  | eOTU0049          | PnecC |             | MT988864 |                 |
| 304 | cd019ec9425bf8e5a20311fcb8edb2b2  | eOTU0050          | PnecC |             | MT988865 |                 |
| 305 | 4d80c3de4a190938aa424c91458f2f8b  | eOTU0051          | PnecC |             | MT988866 |                 |
| 306 | 8f7638217d989e9df5f95f6354c3bd22  | eOTU0052          | PnecC |             | MT988867 |                 |
| 307 | fa2e20db31468ea43216d35e6ec1fac2  | eOTU0053          | PnecC |             | MT988868 |                 |
| 308 | 6ecc5374fe6f40aae225b8915f7b06f   | eOTU0054          | PnecC |             | MT988869 |                 |
| 309 | 9dd6b6801ed43213d9bca64feee58ecb  | eOTU0055          | PnecC |             | MT988870 |                 |
| 310 | cde6a3bf0c89a3acd87615c350e71522b | eOTU0056          | PnecC |             | MT988871 |                 |
| 311 | 48b00c9c53e5e5a4a3e61590a0beaad4  | eOTU0057          | PnecC |             | MT988872 |                 |
| 312 | f55bd83fc5f74bbb5d3603106e9c21d4  | eOTU0058          | PnecC |             | MT988873 |                 |
| 313 | 54e0a3b0a8884635e831d7b6ae9e5e26  | eOTU0059          | PnecC |             | MT988874 |                 |
| 314 | 14104ec4743de6f5b7946154b69ede5b  | eOTU0060          | PnecC |             | MT988875 |                 |
| 315 | 07c8c1f9d65d7af3262ce3f59b6c3446  | eOTU0061          | PnecC |             | MT988876 |                 |
| 316 | 859264e686b31234608cd584a3bf0c10  | eOTU0062          | PnecC |             | MT988877 |                 |
| 317 | d6776c72c6d2a7a09ba50c54d13f15d0  | eOTU0063          | PnecC |             | MT988878 |                 |

|     |                                   |          |       |          |
|-----|-----------------------------------|----------|-------|----------|
| 318 | 648a098fa50999ca6b9f47982e3425d1  | eOTU0064 | PnecC | MT988879 |
| 319 | 482f2ae1d8011251b423859ebcc4ab18  | eOTU0065 | PnecC | MT988880 |
| 320 | e6bb0e8bd5c8a192595b97653f7d8e    | eOTU0066 | PnecC | MT988881 |
| 321 | ea6001db1c699327faad169627bd6d43  | eOTU0067 | PnecC | MT988882 |
| 322 | c3eac120161f4d92bb12bb84e89f05ca  | eOTU0068 | PnecC | MT988883 |
| 323 | 7c89a83995844abe6b2b3e3630fc6fca  | eOTU0069 | PnecC | MT988884 |
| 324 | 0f86b92ea161689e7d569448bf10be    | eOTU0070 | PnecC | MT988885 |
| 325 | 92db9b37c54e45de792397b6080f7ffe  | eOTU0071 | PnecC | MT988886 |
| 326 | 10be82de08aac56d3fc0499add9ad82e  | eOTU0072 | PnecC | MT988887 |
| 327 | eb1f6e04b07ce0ceeffcbb7f945ba939  | eOTU0073 | PnecC | MT988888 |
| 328 | 5a0d86537fa351ea662b2cba3aed53a8  | eOTU0074 | PnecC | MT988889 |
| 329 | de4d03c9f1e5942c0131fcacef5461c0  | eOTU0075 | PnecC | MT988890 |
| 330 | 1fd4f28e107a5fe5f4027a23647cec58  | eOTU0076 | PnecC | MT988891 |
| 331 | 9d39c4aa5a056567e828849d08ea340d  | eOTU0077 | PnecC | MT988892 |
| 332 | b38083809b1041c1344aa94e1345ffb0  | eOTU0078 | PnecC | MT988893 |
| 333 | 6d5c1745bf36c0604db91e1bce61878a  | eOTU0079 | PnecC | MT988894 |
| 334 | 3c2bfa53cd34c0226bf190fb67d4d327  | eOTU0080 | PnecC | MT988895 |
| 335 | 64582505e2b6f8aa56879b1269450382  | eOTU0081 | PnecC | MT988896 |
| 336 | ee1768c34921d39dfe88b0e2a4e0e767  | eOTU0082 | PnecC | MT988897 |
| 337 | 88ba718b7b5e1868b2d31871f89c469   | eOTU0083 | PnecC | MT988898 |
| 338 | aed10cc9e1e35b70f1229850709f8a5e  | eOTU0084 | PnecC | MT988899 |
| 339 | 033ac2cf8f506565668ba22e2c2c3f09  | eOTU0085 | PnecC | MT988900 |
| 340 | 38c046109d9f5d0b3f79668976c3455c  | eOTU0086 | PnecC | MT988901 |
| 341 | 7093cc887e292da6037489f29c72575   | eOTU0087 | PnecC | MT988902 |
| 342 | 49478c4cb2116cc7184992ff237f0842  | eOTU0088 | PnecC | MT988903 |
| 343 | 14f037ab79d442035c2113199d76412d4 | eOTU0089 | PnecC | MT988904 |
| 344 | 3499237b1c4830ea7573d14986baf12   | eOTU0090 | PnecC | MT988905 |
| 345 | 5ea1a969cd9e0fe83286641eb9a3a2a2  | eOTU0091 | PnecC | MT988906 |
| 346 | 71abe25916d6587bbd3f4803557e1746  | eOTU0092 | PnecC | MT988907 |
| 347 | a7f83432f2a595f5fac5fccc6cbb07f40 | eOTU0093 | PnecC | MT988908 |
| 348 | a1b104addad1862a67d1155e6a9a4a95  | eOTU0094 | PnecC | MT988909 |
| 349 | b4522699406c8959cf947b5da6890c52  | eOTU0095 | PnecC | MT988910 |
| 350 | 934c075201c74d5da78f5ccfd2f21630  | eOTU0096 | PnecC | MT988911 |
| 351 | e9a05cf4a76615014a745c8b364fc2f2  | eOTU0097 | PnecC | MT988912 |
| 352 | 54595ed07b2c1e2f4c435eef9c6e131   | eOTU0098 | PnecC | MT988913 |
| 353 | 40177fbec94ed38e5b0a6c055bfff299  | eOTU0099 | PnecC | MT988914 |
| 354 | dc017733bcf70bc65af31a4ef1b41a83  | eOTU0100 | PnecC | MT988915 |
| 355 | b8fb64aa052a8f3893e445c37e8e9dc2  | eOTU0101 | PnecC | MT988916 |
| 356 | aab8c40ca3fe3f97ff26dc162eda2fa0  | eOTU0102 | PnecC | MT988917 |
| 357 | df62fccc65d535f18aca0ff6ae181d046 | eOTU0103 | PnecC | MT988918 |
| 358 | 15f9afcf95582cfd27d33ec0a331550   | eOTU0104 | PnecC | MT988919 |
| 359 | feee86a8c3b2be28211b68d6a682db5   | eOTU0105 | PnecC | MT988920 |
| 360 | 78ee46896df9f64e0aca699682fd3179  | eOTU0106 | PnecC | MT988921 |
| 361 | cf39bf406cbbaac345b9032c1aba716b  | eOTU0107 | PnecC | MT988922 |
| 362 | d7cdbcc2c476603e660aca6286e510f8  | eOTU0108 | PnecC | MT988923 |
| 363 | 534f55067a8232f1ce21b32487147a93  | eOTU0109 | PnecC | MT988924 |
| 364 | b504c58e6c1c3f5f537e0926435d1fe1  | eOTU0110 | PnecC | MT988925 |
| 365 | 9982ecbd07d8d3fded9427eea4154a95  | eOTU0111 | PnecC | MT988926 |
| 366 | c9ae125dc44918900ed9d90383254189  | eOTU0112 | PnecC | MT988927 |
| 367 | ae30db13874334df43768404dd0a19    | eOTU0113 | PnecC | MT988928 |
| 368 | 7677f65245a87b31d5a3b9160dbe91bb  | eOTU0114 | PnecC | MT988929 |
| 369 | 94cf8a6ae143a26412a3ccb01d1d466   | eOTU0115 | PnecC | MT988930 |
| 370 | 31e7ac5351a0207ed0c224d79308165f  | eOTU0116 | PnecC | MT988931 |
| 371 | 750ea0f43b96086e1f12aa863f1b8d03  | eOTU0117 | PnecC | MT988932 |
| 372 | f2726c3116477b208277031c73adcab5  | eOTU0118 | PnecC | MT988933 |
| 373 | 1252f685dd4a2f80a26dad7b0aedb5b   | eOTU0119 | PnecC | MT988934 |
| 374 | f8b7252a9275c6ade8d185bc76bccc46  | eOTU0120 | PnecC | MT988935 |
| 375 | 244c5e8e75ccf275ecc8db781c291747  | eOTU0121 | PnecC | MT988936 |
| 376 | 0918c5d4fb77090df9e0af6fd423ef65  | eOTU0122 | PnecC | MT988937 |
| 377 | 514fc6214c765ccd71731a0a7b574328  | eOTU0123 | PnecC | MT988938 |
| 378 | 6f728aa6f4d28e9dc7c15fa8d9afdf0fe | eOTU0124 | PnecC | MT988939 |
| 379 | 0e0eeffc7f14bd55fa2ff519932e6ccfb | eOTU0125 | PnecC | MT988940 |
| 380 | 7952377dc54ae2b397a572ac1b46f7af  | eOTU0126 | PnecC | MT988941 |
| 381 | 534965e1567ff45822ca12602f430424  | eOTU0127 | PnecC | MT988942 |
| 382 | d2dd98928a2382add2348a7858df2cf4  | eOTU0128 | PnecC | MT988943 |
| 383 | e5ef1f8d3717faab0c03979da1d5f40e  | eOTU0129 | PnecC | MT988944 |
| 384 | 6e3cd4329605f1e7e3cf4b7a2d354eb4  | eOTU0130 | PnecC | MT988945 |
| 385 | 3f59159bfda5e7a6600e74c99344f046  | eOTU0131 | PnecC | MT988946 |
| 386 | 52f25409416c2eb9fc3367e7e6a0fd02  | eOTU0132 | PnecC | MT988947 |
| 387 | f561f7e78dd0853d30e6ebec556cdc37  | eOTU0133 | PnecC | MT988948 |
| 388 | d8ef3aea5312b8d5201e8fb1929606ab  | eOTU0134 | PnecC | MT988949 |
| 389 | 8199882f4812efcd0086f501b2142028  | eOTU0135 | PnecC | MT988950 |
| 390 | 9ea9e64d07e0eb045ad6436434523c40  | eOTU0136 | PnecC | MT988951 |
| 391 | 9c2126446644d18e080ef107b2872614  | eOTU0137 | PnecC | MT988952 |
| 392 | 08e983a3f46872746ab424d4e3f9753c  | eOTU0138 | PnecC | MT988953 |
| 393 | 4b49728f590a26a73aadef6c2e6ffbc3  | eOTU0139 | PnecC | MT988954 |
| 394 | 0a825ee75b81044561c295d9508170cb  | eOTU0140 | PnecC | MT988955 |
| 395 | ad76270237866cb2306237696093b4b8  | eOTU0141 | PnecC | MT988956 |
| 396 | 3f248dfe4ef98c76ac0be7b1dee842d9  | eOTU0142 | PnecC | MT988957 |
| 397 | 16eab8186b89f0267d048c50f0ea8413  | eOTU0143 | PnecC | MT988958 |
| 398 | cfbfbc730322e54eff8e9441c45697fb  | eOTU0144 | PnecC | MT988959 |
| 399 | b2bf82244a8d7d16508761a2b4396f1b  | eOTU0145 | PnecC | MT988960 |

|     |                                   |          |       |          |
|-----|-----------------------------------|----------|-------|----------|
| 400 | 8e9a9fea06d724d3f4c3ec43d9491cc3  | eOTU0146 | PnecC | MT988961 |
| 401 | c008c1c0677b8b93e9c609c794920f54  | eOTU0147 | PnecC | MT988962 |
| 402 | 7ba69165c65037e3bb338a1753285003  | eOTU0148 | PnecC | MT988963 |
| 403 | b237b44186704454772bd6943d7f0302  | eOTU0149 | PnecC | MT988964 |
| 404 | 7d48551bc1b4b9c781e7e8ff8176bafbc | eOTU0150 | PnecC | MT988965 |
| 405 | 1d211ffcd4a4a472a1c0b442faacffbcc | eOTU0151 | PnecC | MT988966 |
| 406 | bb4f58f78bf88d0be554e7d0f53aca26  | eOTU0152 | PnecC | MT988967 |
| 407 | c33d9564104666c5b7bb4aac844cf0e   | eOTU0153 | PnecC | MT988968 |
| 408 | cddeb0c2b612243aaba86a4d6275ad7   | eOTU0154 | PnecC | MT988969 |
| 409 | c6dc796066b6258cd9a54040c3445b2   | eOTU0155 | PnecC | MT988970 |
| 410 | 79ede9484cb9487c6ca3b46343679e3e  | eOTU0156 | PnecC | MT988971 |
| 411 | e4c00a3c326d7aa4e17ee15e95cb1d62  | eOTU0157 | PnecC | MT988972 |
| 412 | 46d816dd052b40dd7f9208c23c8797a   | eOTU0158 | PnecC | MT988973 |
| 413 | 05b94443ec2abe210557ea4df4da53e1  | eOTU0159 | PnecC | MT988974 |
| 414 | 525da9f4c232a9d5509aefa151f68a7   | eOTU0160 | PnecC | MT988975 |
| 415 | 98890beed66b677719abebe2317ed8c9  | eOTU0161 | PnecC | MT988976 |
| 416 | 22459e47728caae33246fc4394c76a8   | eOTU0162 | PnecC | MT988977 |
| 417 | 925a3a08ed0b97cc09a0ebf71869940d  | eOTU0163 | PnecC | MT988978 |
| 418 | 452a82942c16650c2dca6c43a9cbf1c   | eOTU0164 | PnecC | MT988979 |
| 419 | cecaac6a008fc3099e13aaf461896b8   | eOTU0165 | PnecC | MT988980 |
| 420 | 19e5ef6c3824511e196442ec4901813e  | eOTU0166 | PnecC | MT988981 |
| 421 | 61973c26434ac4e62fed148e1d0d6220  | eOTU0167 | PnecC | MT988982 |
| 422 | 43d20607250e97c4fc3e875aab8a1ed1  | eOTU0168 | PnecC | MT988983 |
| 423 | a5d2a58cdd1ec995506b261ff83e157   | eOTU0169 | PnecC | MT988984 |
| 424 | 664be10cb66e7e5766b456ba12320fb9  | eOTU0170 | PnecC | MT988985 |
| 425 | df800f6c822228bb1c203d9766084dee  | eOTU0171 | PnecC | MT988986 |
| 426 | ca6a6f80f50f809e0ab9b64c850f88f3  | eOTU0172 | PnecC | MT988987 |
| 427 | 75fe02e882a8c2cfa09e1af8440b8e9e  | eOTU0173 | PnecC | MT988988 |
| 428 | 6cc9c832d8267fd3452b43e2ddde4d7f  | eOTU0174 | PnecC | MT988989 |
| 429 | aadd1a5a25367c0357754ed7f9d5c5f63 | eOTU0175 | PnecC | MT988990 |
| 430 | 65b9fbfd816e259c292b0438b1bd0c06  | eOTU0176 | PnecC | MT988991 |
| 431 | 9aee3e0fc5ac13d87feaa566d21d3a1a  | eOTU0177 | PnecC | MT988992 |
| 432 | aae92447834909bd1d82d24e244c91b8  | eOTU0178 | PnecC | MT988993 |
| 433 | a3041902e0e0c9626d378ac0d854cd1a  | eOTU0179 | PnecC | MT988994 |
| 434 | d1631c4873c44061051149fa4d685d0   | eOTU0180 | PnecC | MT988995 |
| 435 | 251d5987d2c3c855a2bca77d12c0c4db  | eOTU0181 | PnecC | MT988996 |
| 436 | 71e6be7e31a9e43c6a01a750c0bb11d   | eOTU0182 | PnecC | MT988997 |
| 437 | 506dadde9aea0ae2945e27c63ea8100f  | eOTU0183 | PnecC | MT988998 |
| 438 | a72bcd2519700b44fd55add55b099ea   | eOTU0184 | PnecC | MT988999 |
| 439 | 13e4c05bbd9e6fec087706c411374b40  | eOTU0185 | PnecC | MT989000 |
| 440 | e011599473baa77d79ad2e7056248d2   | eOTU0186 | PnecC | MT989001 |
| 441 | 50b2bda123cd1941510e6ce674fde3d3  | eOTU0187 | PnecC | MT989002 |
| 442 | 3477cc13f3b98b537176e73869ac219c  | eOTU0188 | PnecC | MT989003 |
| 443 | c5b3e779b9970313a0e013e9b464945a  | eOTU0189 | PnecC | MT989004 |
| 444 | 33fe59656a737cd7a61ae3b5673a4947  | eOTU0190 | PnecC | MT989005 |
| 445 | b267c3145374a9e2e2cb0ca2ffe3e1b5  | eOTU0191 | PnecC | MT989006 |
| 446 | 0d65e50384e21f99bb050c2ae363d56b  | eOTU0192 | PnecC | MT989007 |
| 447 | d1913be420f713b7628e75ad980b4ac6  | eOTU0193 | PnecC | MT989008 |
| 448 | 1a40ad313c366310b36cfd2a2b30bf2   | eOTU0194 | PnecC | MT989009 |
| 449 | 332b0b06ca023efef6e8a0cf25691c8   | eOTU0195 | PnecC | MT989010 |
| 450 | 1a91c186ca5ac1588d0d04f4f52fb22a  | eOTU0196 | PnecC | MT989011 |
| 451 | dee4a69ad6d0525da9c85b9a17a888d96 | eOTU0197 | PnecC | MT989012 |
| 452 | f9513b9dcd2c7431ce5a6e3d633dc56c  | eOTU0198 | PnecC | MT989013 |
| 453 | cadd3f59cd0d5359b38f8fc5cac8e15a  | eOTU0199 | PnecC | MT989014 |
| 454 | de6025842da6648d8b1f8856ba5e084b  | eOTU0200 | PnecC | MT989015 |
| 455 | 6842cec27e7e767856588619adb83d95  | eOTU0201 | PnecC | MT989016 |
| 456 | 6cbccbc966527dba4a8d192f1bcea0af  | eOTU0202 | PnecC | MT989017 |
| 457 | 9b78daa95f06c885d42e2274dd38f81   | eOTU0203 | PnecC | MT989018 |
| 458 | 47dd385bad31c54b4f484b3db523bf95  | eOTU0204 | PnecC | MT989019 |
| 459 | 9bb4e4bed395cd09ff1b1874b2c77647  | eOTU0205 | PnecC | MT989020 |
| 460 | a17507e5d8805167ca3a4e4c823af6c0  | eOTU0206 | PnecC | MT989021 |
| 461 | e670d800c657ca38d2a67c6692b0aaa   | eOTU0207 | PnecC | MT989022 |
| 462 | 633930aed0c74912316fffb1bd7282141 | eOTU0208 | PnecC | MT989023 |
| 463 | 9d7b0e5823156e72459e2be4148fbc8f  | eOTU0209 | PnecC | MT989024 |
| 464 | 1c46e73d257da1cd85e076f5da8319af  | eOTU0210 | PnecC | MT989025 |
| 465 | 39c9e68ad486cd0b1b9d5ad2a74bcb4   | eOTU0211 | PnecC | MT989026 |
| 466 | e9e1474d133fb52b33bee94a443e0ff6  | eOTU0212 | PnecC | MT989027 |
| 467 | 3ba7a52b0182d1bad04caf34bb5d4714  | eOTU0213 | PnecC | MT989028 |
| 468 | af92ccc1593d80b0cbb6648deaac0c5f  | eOTU0214 | PnecC | MT989029 |
| 469 | f522d2881ba4f1c3adcc35d7ab4df60b2 | eOTU0215 | PnecC | MT989030 |
| 470 | 3aec608eb6ce8fb78aa04d817444440   | eOTU0216 | PnecC | MT989031 |
| 471 | defaf8a9f89a0adcae6c20f53259a53e  | eOTU0217 | PnecC | MT989032 |
| 472 | fcdb136905c7a19232574a211da37eee  | eOTU0218 | PnecC | MT989033 |
| 473 | 6ecd8e289f17cb0d58c8225a2498987f  | eOTU0219 | PnecC | MT989034 |
| 474 | 74d4eabfa7c7a6b0bebe2fce0e67663   | eOTU0220 | PnecC | MT989035 |
| 475 | bb8d80e9639e23913d129e23d4e6e100  | eOTU0221 | PnecC | MT989036 |
| 476 | bd90eeb11eb1e58b8fe98b29ab4a48fa  | eOTU0222 | PnecC | MT989037 |
| 477 | 63a3b73e9f7e97546dea7fb7f881283d  | eOTU0223 | PnecC | MT989038 |
| 478 | 2a57088f585d26586bb2e894a2472a3   | eOTU0224 | PnecC | MT989039 |
| 479 | dce483c3c74024380dd8b2b4454586b   | eOTU0225 | PnecC | MT989040 |
| 480 | 18d0c0113aa8e1b4b05e27be44692ef1  | eOTU0226 | PnecC | MT989041 |
| 481 | 88427741e2f7a30eb8a382e70f230c74  | eOTU0227 | PnecC | MT989042 |

|     |                                      |          |       |          |
|-----|--------------------------------------|----------|-------|----------|
| 482 | e356210edc1c3f10be7430eed976ae       | eOTU0228 | PnecC | MT989043 |
| 483 | 6a6f06285acd05eedefa223e8fd243aa     | eOTU0229 | PnecC | MT989044 |
| 484 | 48b291b934f8cacc2641faab296c2c2      | eOTU0230 | PnecC | MT989045 |
| 485 | d749483eda3818ea9d58e6406354e7e2     | eOTU0231 | PnecC | MT989046 |
| 486 | 12d6231ebf3d22af47d1a8d395c11689     | eOTU0232 | PnecC | MT989047 |
| 487 | 64947c3151c98101f5d06b622d83aa26     | eOTU0233 | PnecC | MT989048 |
| 488 | 732d6c3bcf94c6438a7cab064b276ad0     | eOTU0234 | PnecC | MT989049 |
| 489 | f1b6a32055967e6b813330c0515ac143     | eOTU0235 | PnecC | MT989050 |
| 490 | d7536d1c0f71d2e6e014667849a3634a     | eOTU0236 | PnecC | MT989051 |
| 491 | 4cf85029c93b90a0fe4e19f5d0574d44     | eOTU0237 | PnecC | MT989052 |
| 492 | d04c090678c966b089a260e1a70aedf      | eOTU0238 | PnecC | MT989053 |
| 493 | e18e49b73083c8b8c21abc8df0f84726     | eOTU0239 | PnecC | MT989054 |
| 494 | 98b8a6bf2ede548bdee1426d7d92636b     | eOTU0240 | PnecC | MT989055 |
| 495 | b1646358f9888515b79491731517292e     | eOTU0241 | PnecC | MT989056 |
| 496 | 5e2ad3f7ad43669ed7f86509a6bd9c6      | eOTU0242 | PnecC | MT989057 |
| 497 | bfa53411b61f8b184515e5c4251ca541     | eOTU0243 | PnecC | MT989058 |
| 498 | e0bc730fc77e2510a4b5f24b4e54dc7e     | eOTU0244 | PnecC | MT989059 |
| 499 | 5f936c20559910f1e3867592ea565eaa     | eOTU0245 | PnecC | MT989060 |
| 500 | 8b4363fcb2561f20d382d4b9a4659ea5     | eOTU0246 | PnecC | MT989061 |
| 501 | cdf0afb21ceac2ad712f0f1ca2ba119      | eOTU0247 | PnecC | MT989062 |
| 502 | e01794e570686763605f37483b7f248a     | eOTU0248 | PnecC | MT989063 |
| 503 | ecda42d98538e5d58c2b4b4d2741ccdd     | eOTU0249 | PnecC | MT989064 |
| 504 | ff884bd7556d571c1c675300231242       | eOTU0250 | PnecC | MT989065 |
| 505 | c7cfa507c9472282e758658be51378f      | eOTU0251 | PnecC | MT989066 |
| 506 | edf6ec378f9c69d0078a692d51a17df7     | eOTU0252 | PnecC | MT989067 |
| 507 | 4926893059b3626b261d1e6a7cb7f9       | eOTU0253 | PnecC | MT989068 |
| 508 | ce6e44ceclacc73041f8739b13113cb7     | eOTU0254 | PnecC | MT989069 |
| 509 | f4516440cdf7d3dd01fcd11ba6094cfb     | eOTU0255 | PnecC | MT989070 |
| 510 | 1b88e36df4bc5f236627b17a829da344     | eOTU0256 | PnecC | MT989071 |
| 511 | 0a76c1887964721827aa0a1565adf420     | eOTU0257 | PnecC | MT989072 |
| 512 | 31a47863c1b261242c34c68b90f84cae     | eOTU0258 | PnecC | MT989073 |
| 513 | 4522b5a2f4dfbf4d90f72c0bc74b74f      | eOTU0259 | PnecC | MT989074 |
| 514 | 7a2633fcl1a535465c47050e0112c5faa    | eOTU0260 | PnecC | MT989075 |
| 515 | 7d5311c8d29d79df275ff9ad21a5d00f     | eOTU0261 | PnecC | MT989076 |
| 516 | 20cd9d949d48753c1a3cc81d086e2a       | eOTU0262 | PnecC | MT989077 |
| 517 | 9b3e693a6460bb8b73f8067dd602be18     | eOTU0263 | PnecC | MT989078 |
| 518 | f14b203771d349f3bfb6e3f1c6ab8d36     | eOTU0264 | PnecC | MT989079 |
| 519 | 1c61b311f376ab73639f14b944377af6     | eOTU0265 | PnecC | MT989080 |
| 520 | 7b182885c114d760754784d70397d870     | eOTU0266 | PnecC | MT989081 |
| 521 | 9302843bc61c7ab5b65f11225aeefec      | eOTU0267 | PnecC | MT989082 |
| 522 | d610b5fccel624dc7de6cce3f2961189     | eOTU0268 | PnecC | MT989083 |
| 523 | 10bf16d3c5f94d96bec0ca5b304a6a13     | eOTU0269 | PnecC | MT989084 |
| 524 | 6ff9c2c71b639fc36b905c9b3fc382e      | eOTU0270 | PnecC | MT989085 |
| 525 | 4c639c2981b4f9abde7e97c2148e370c     | eOTU0271 | PnecC | MT989086 |
| 526 | ae0128654f46931c9fff3275dab6a926     | eOTU0272 | PnecC | MT989087 |
| 527 | 00ac612835dal144edda4baf9cb2c2a1e    | eOTU0273 | PnecC | MT989088 |
| 528 | 80ea9bf6546a9b7ca93832088dd37a2e     | eOTU0274 | PnecC | MT989089 |
| 529 | 4ceb40e0c677e732bd2123240ee4d2a9     | eOTU0275 | PnecC | MT989090 |
| 530 | 8914c38741bf32762fe9db7aa2320860     | eOTU0276 | PnecC | MT989091 |
| 531 | 20e014f0f0a0bc63c9769ba0ae1e92fd     | eOTU0277 | PnecC | MT989092 |
| 532 | 3084f1671bc8f1dfc62cd30b5cbda00      | eOTU0278 | PnecC | MT989093 |
| 533 | 96c9ce3dd910c304bab5a685d40b548      | eOTU0279 | PnecC | MT989094 |
| 534 | e4d9af533df611b438d8c7d96d611f86     | eOTU0280 | PnecC | MT989095 |
| 535 | daf817f4d8d27d315db70a6d7991d86b     | eOTU0281 | PnecC | MT989096 |
| 536 | 013e2760794d4b3dedc1842cd838169      | eOTU0282 | PnecC | MT989097 |
| 537 | 70a9175eaal6c6405cd212365531fb2ba    | eOTU0283 | PnecC | MT989098 |
| 538 | fad286b586a1dcd3c13098f1374f3977     | eOTU0284 | PnecC | MT989099 |
| 539 | 46a16369b022732b3e438e516197c29      | eOTU0285 | PnecC | MT989100 |
| 540 | a46b282373578bcc95882ce2257577fb     | eOTU0286 | PnecC | MT989101 |
| 541 | 35befad8388e255b3e2f43f4f374ac5f     | eOTU0287 | PnecC | MT989102 |
| 542 | 37bae77767231355e191adb93a5c5cb40    | eOTU0288 | PnecC | MT989103 |
| 543 | 8506cb6fe66d48f0e06772f19421d6f9     | eOTU0289 | PnecC | MT989104 |
| 544 | a0b069e06ec6bae318504da75f1f6f4a     | eOTU0290 | PnecC | MT989105 |
| 545 | 77edf2ef498310d85631e735c4d6ec39     | eOTU0291 | PnecC | MT989106 |
| 546 | 363a9e3ad66a066b2d8bb1541d5955bee    | eOTU0292 | PnecC | MT989107 |
| 547 | c1a69dfde41f6d00afe499641dd8099      | eOTU0293 | PnecC | MT989108 |
| 548 | d41260cc5ced42faea0533974d52a4bf     | eOTU0294 | PnecC | MT989109 |
| 549 | 927156037b2fcdad020bfeabd3c429e1     | eOTU0295 | PnecC | MT989110 |
| 550 | a43cf53374c86d61043fe4b059eeef94     | eOTU0296 | PnecC | MT989111 |
| 551 | d3ca2a939387f3c7cbf12485a195b41d     | eOTU0297 | PnecC | MT989112 |
| 552 | a462ed864d2e3dddfe02ab03115a2a86     | eOTU0298 | PnecC | MT989113 |
| 553 | a81cb50425c40907805c3bc385091575     | eOTU0299 | PnecC | MT989114 |
| 554 | b901eeeb32cd5aaec59d295362eb552a     | eOTU0300 | PnecC | MT989115 |
| 555 | 50b37379e90d1a1e31ae31ae648b4c57a8ba | eOTU0301 | PnecC | MT989116 |
| 556 | d25b60957d180969d4540bd029d04308     | eOTU0302 | PnecC | MT989117 |
| 557 | f6a4195f9f761c3cc993de72c7dfbbfc     | eOTU0303 | PnecC | MT989118 |
| 558 | 1403086c960724cba4c95bead569062a     | eOTU0304 | PnecC | MT989119 |
| 559 | 7996bb041e5f6a21c4a893d4d4b9855d     | eOTU0305 | PnecC | MT989120 |
| 560 | e1bd6fcb7e1862e64bd4786cf4134ee8     | eOTU0306 | PnecC | MT989121 |
| 561 | 74ba96a88d02f21f4d2e4d56ca00e468     | eOTU0307 | PnecC | MT989122 |
| 562 | bffc154398e4b4f9170dd4b934040d32     | eOTU0308 | PnecC | MT989123 |
| 563 | f4dc55000c591f952e1d94b7b78ae876     | eOTU0309 | PnecC | MT989124 |

|     |                                   |          |        |          |
|-----|-----------------------------------|----------|--------|----------|
| 564 | 32aa1babb074ee9c9bd596622339489f6 | eOTU0310 | PnecC  | MT989125 |
| 565 | 395f67fdb9fd4b2c61550e617eeef722b | eOTU0311 | PnecC  | MT989126 |
| 566 | 9c97d7b13c3cf93c5c03f9f5f4f41e03  | eOTU0312 | PnecC  | MT989127 |
| 567 | 5c8aa94e62a8a062edeaa8043bd6f7b0  | eOTU0313 | PnecC  | MT989128 |
| 568 | 1ccac41c3861800a2cd19f9a22a12c2b  | eOTU0314 | PnecC  | MT989129 |
| 569 | 2bedf687cc9cb83df11f125b4d89120f  | eOTU0315 | PnecC  | MT989130 |
| 570 | 31d68bf98e8f547b967236e81a26b2e0  | eOTU0316 | PnecC  | MT989131 |
| 571 | 3e04226bc0a4bf6cbcf0d4c5988a5ef2  | eOTU0317 | PnecC  | MT989132 |
| 572 | 4d4c20d5ba563c05c8dee6cd8ed90667  | eOTU0318 | PnecC  | MT989133 |
| 573 | 5bf9ba33e2f47115de837ef9fe47809f  | eOTU0319 | PnecC  | MT989134 |
| 574 | 69be6116893d4c363a607f5d96509450  | eOTU0320 | PnecC  | MT989135 |
| 575 | a29d789d0ef7e3006544704176fd3748  | eOTU0321 | PnecC  | MT989136 |
| 576 | 219ea694cd10090d9368af6d7982b39f  | eOTU0322 | PnecC  | MT989137 |
| 577 | 5e3206af59b237a11dd6e6cb63ccb190  | eOTU0323 | PnecC  | MT989138 |
| 578 | 1cc9d4358d5c53d641399b2577ddf804  | eOTU0324 | PnecC  | MT989139 |
| 579 | 4fe16bee3b8d288f1a01f1fcc792a127  | eOTU0325 | PnecC  | MT989140 |
| 580 | 5887e50f0f3b4b61fa1b2b6e33dfbd    | eOTU0326 | PnecC  | MT989141 |
| 581 | e45afdcb207dd365b2d90588315e48dd  | eOTU0327 | PnecC  | MT989142 |
| 582 | 31013968e2afca4fbd125ea0fdaf398   | eOTU0328 | PnecC  | MT989143 |
| 583 | 9169b2c64f6ea61867d7f673c5695fc   | eOTU0329 | PnecC  | MT989144 |
| 584 | fd1b6c48b607d6997326e47878f1ecd   | eOTU0330 | PnecC  | MT989145 |
| 585 | 65ee0a11fb70c847cf352f4e828a18b   | eOTU0331 | PnecC  | MT989146 |
| 586 | 6ff1b97503621f2869049e4cb5228e1e  | eOTU0332 | PnecC  | MT989147 |
| 587 | 9285f0dd6962759d63754b95c87f4cb5  | eOTU0333 | PnecC  | MT989148 |
| 588 | 0131ae4c1bf25c848647b71be362809   | eOTU0334 | PnecC  | MT989149 |
| 589 | 2b4be31b4bc3bc78585063a92f2d4a26  | eOTU0335 | PnecC  | MT989150 |
| 590 | 3ed9cfc287d527a05a7030ed9a3513ff  | eOTU0336 | PnecC  | MT989151 |
| 591 | 7676ac1f4fc737c80edeac4f7ed9544   | eOTU0337 | PnecC  | MT989152 |
| 592 | 8df193dce3f5628852520c9068dd637c  | eOTU0338 | PnecC  | MT989153 |
| 593 | e1110475b55e91d8dad278a39361482b  | eOTU0339 | PnecC  | MT989154 |
| 594 | 25c221b2706f99752e9bdee3e8cb808a  | eOTU0340 | PnecC  | MT989155 |
| 595 | 278c123e4b47eb02aee6d7e5cd4c34e   | eOTU0341 | PnecC  | MT989156 |
| 596 | 67b08f9f091e6e1adbd2b06c37e8e29a  | eOTU0342 | PnecC  | MT989157 |
| 597 | b701b616099922924e1bf289b3f11e3   | eOTU0343 | PnecC  | MT989158 |
| 598 | 0d7134c35ad144a85ec431167784cf96  | eOTU0344 | PnecC  | MT989159 |
| 599 | 32c3375303cbe5fad8dc15494a642e2   | eOTU0345 | PnecC  | MT989160 |
| 600 | 337a1e4cc5580e8ee616033fb51298dc  | eOTU0346 | PnecC  | MT989161 |
| 601 | 5203fcdabeb6e4ae1f6cad4db828ab227 | eOTU0347 | PnecC  | MT989162 |
| 602 | 6c50e3995c464e655fb851f005d3d1ce  | eOTU0348 | PnecC  | MT989163 |
| 603 | 905645d38f6be678f041d9628553014b  | eOTU0349 | PnecC  | MT989164 |
| 604 | e5f065213a24499d5a514b2b7612b4f9  | eOTU0350 | PnecC  | MT989165 |
| 605 | e7ef384a62671022487b0cd0a1af42d02 | eOTU0351 | PnecC  | MT989166 |
| 606 | 8f70d51ce4a661fa7e733af7d7df51f1  | eOTU0352 | PnecC  | MT989167 |
| 607 | c4c311831e170b6056b3347464a35d0a  | eOTU0353 | PnecC  | MT989168 |
| 608 | ca060b498502d4c75df0d9b12a382f65  | eOTU0354 | PnecC  | MT989169 |
| 609 | d9e504f6c00ac00863d8060310e6f7e0  | eOTU0355 | PnecC  | MT989170 |
| 610 | 30edbb07aca91822ab3b3e554aee21019 | eOTU0356 | PnecC  | MT989171 |
| 611 | 5a32832d4e315c8366721ce2401f79b4  | eOTU0357 | PnecC  | MT989172 |
| 612 | b065d5078a8c9a5334d9ea3cd0da2821  | eOTU0358 | PnecC  | MT989173 |
| 613 | b718c0e19e7bca1e649d4ca1f002abff  | eOTU0359 | PnecC  | MT989174 |
| 614 | d6e9c8987778bee69258e9b7d46b7500  | eOTU0360 | PnecC  | MT989175 |
| 615 | 33c0721830828f7747ead3ee5424aed   | eOTU0361 | PnecC  | MT989176 |
| 616 | 55c7e38156655d42c0b49e870d3d1518  | eOTU0362 | PnecC  | MT989177 |
| 617 | 7df724b285c2b2d262b56d8ba16f814a  | eOTU0363 | PnecC  | MT989178 |
| 618 | 892739e0a3f93c2d43767db235b178ee  | eOTU0364 | PnecC  | MT989179 |
| 619 | ef10094335d46df84865566782aa6942  | eOTU0365 | PnecC  | MT989180 |
| 620 | 0d141331abd39d8bd76d6cb22b69b604  | eOTU0366 | PnecC  | MT989181 |
| 621 | 2ab42cf37514806eb6a7b7dd0ea6b479  | eOTU0367 | PnecC  | MT989182 |
| 622 | 4cb86f3a5af05114d98fcd2f6b677259  | eOTU0368 | PnecC  | MT989183 |
| 623 | ad7ae517bea546c8efbf64acc3075139  | eOTU0369 | PnecC  | MT989184 |
| 624 | b812e4ccbfccef3ee940ec6ca2e51f6c  | eOTU0370 | PnecC  | MT989185 |
| 625 | cd09415e4f541826ca158929eecd2d8a  | eOTU0371 | PnecC  | MT989186 |
| 626 | e48fc567a6de2e9134a46c001cf32a4b  | eOTU0372 | PnecC  | MT989187 |
| 627 | 205ee92aeb2adf2863dc6f8a3f0407a4  | eOTU0373 | PnecC  | MT989188 |
| 628 | 3c80f2f93c1229b2aa43540d0e0bcfe9  | eOTU0374 | PnecC  | MT989189 |
| 629 | 401ca365c999a340f91977c784322b47  | eOTU0375 | PnecC  | MT989190 |
| 630 | 4242f6b5f58d53f59c25ca81f0603c9f  | eOTU0376 | PnecC  | MT989191 |
| 631 | 9a1aa9c215d3671712b53d35dd5f67d8  | eOTU0377 | PnecC  | MT989192 |
| 632 | b02067ae7177ea0370c22b4e27b80218  | eOTU0378 | PnecC  | MT989193 |
| 633 | b0956137c9dc86ed0cb66ff55bf2a0b5  | eOTU0379 | PnecC  | MT989194 |
| 634 | b38bb702f4d109cfc77a22f696a969b45 | eOTU0380 | PnecC  | MT989195 |
| 635 | b3b7809fc281c4d51cbfa370e732af3c  | eOTU0381 | PnecC  | MT989196 |
| 636 | eaed22a0456f5fd07ae154080c8cdeca  | eOTU0382 | PnecB1 | MT989197 |
| 637 | 175867466d6ba9481411b29de5df92ef  | eOTU0383 | PnecC  | MT989198 |
| 638 | 3460aac508eca137a6efcacacfa93f5e  | eOTU0384 | PnecC  | MT989199 |
| 639 | 4be2b824def0e4c2ab8e81738dc0ce5   | eOTU0385 | PnecC  | MT989200 |
| 640 | 4d3f31986417043b28575c0cd4bef38f  | eOTU0386 | PnecC  | MT989201 |
| 641 | 6506fa2fd5d97f836c8872d94f9409c9  | eOTU0387 | PnecC  | MT989202 |
| 642 | 6dd8a307fb999f5ecce8c9a563ca83590 | eOTU0388 | PnecC  | MT989203 |
| 643 | 830ecc6157457bfaafd1339f082f9a7a  | eOTU0389 | PnecC  | MT989204 |
| 644 | 87381950b159c787018e5919758beceb  | eOTU0390 | PnecC  | MT989205 |
| 645 | 997ea7af1a56992b9a0411956b1820f1  | eOTU0391 | PnecC  | MT989206 |

|     |                                   |          |        |          |
|-----|-----------------------------------|----------|--------|----------|
| 646 | bacd9ea3fa7fed98b40f61b00c599feb  | eOTU0392 | PnecC  | MT989207 |
| 647 | e01c0d4a7f1b783a8665cb8d0faedf52  | eOTU0393 | PnecC  | MT989208 |
| 648 | fb1e062b324bc1c845d4fa922d101f0c  | eOTU0394 | PnecC  | MT989209 |
| 649 | 11a6b37b940f02ed4f079e44a89c15c6  | eOTU0395 | PnecC  | MT989210 |
| 650 | 165e1364fb7e038ed7fc008e8d94cbf9  | eOTU0396 | PnecC  | MT989211 |
| 651 | 25bdafa8f167c5b94e2ae49f12b366ba  | eOTU0397 | PnecC  | MT989212 |
| 652 | 2b1b41401f1760d2737dceb19e3acc1c  | eOTU0398 | PnecC  | MT989213 |
| 653 | 300b53045380f68dcaed13d642585b52  | eOTU0399 | PnecC  | MT989214 |
| 654 | 37b1742374709a4363e1a71a3cefee27  | eOTU0400 | PnecC  | MT989215 |
| 655 | 3b18c6238ad88791d9525c338a982cf2  | eOTU0401 | PnecC  | MT989216 |
| 656 | 3e28162bb0fb97396c0f9da375683620  | eOTU0402 | PnecC  | MT989217 |
| 657 | 68bd8fd8e8fd83bd9bd517b3cee9962a  | eOTU0403 | PnecC  | MT989218 |
| 658 | 7205c7814b24674b6e37d20977ba77e1  | eOTU0404 | PnecC  | MT989219 |
| 659 | 7c5a49cf4149b3500ba5c92ba20e918   | eOTU0405 | PnecC  | MT989220 |
| 660 | 80b39317d4132e692e8983e9c2d7ec9   | eOTU0406 | PnecC  | MT989221 |
| 661 | 884a0df5bf54adb864ff37c367fc02c3  | eOTU0407 | PnecC  | MT989222 |
| 662 | 8b730f296029f432950a574f0ef316160 | eOTU0408 | PnecB1 | MT989223 |
| 663 | 93c760811a9cf0d6cc7ba0a8aaab7071  | eOTU0409 | PnecC  | MT989224 |
| 664 | 9b103d8ce76ef530e078cda6c6747f02  | eOTU0410 | PnecC  | MT989225 |
| 665 | b8d8e83e4df7c3622635c7bfc80dc93   | eOTU0411 | PnecB1 | MT989226 |
| 666 | caa8bd71c96314dccc6007a129e60cdf  | eOTU0412 | PnecC  | MT989227 |
| 667 | d62f151a76a2b0656deedbe0bac1187   | eOTU0413 | PnecC  | MT989228 |
| 668 | db854e2fa20d0c2c6674e435b1447564  | eOTU0414 | PnecC  | MT989229 |
| 669 | e919e53e6e2b8143ede4f094d503dc5f  | eOTU0415 | PnecC  | MT989230 |
| 670 | fedd56e2f5d9281e89ece3dc230ff30a  | eOTU0416 | PnecC  | MT989231 |
| 671 | 24db3879ffe68b37a29c054dbee3cb2   | eOTU0417 | PnecC  | MT989232 |
| 672 | 35971e204b388efb512621672bf8bb37  | eOTU0418 | PnecC  | MT989233 |
| 673 | 42faa35a92cbbc9c3de934324b34d69c  | eOTU0419 | PnecC  | MT989234 |
| 674 | 762679926ec8d31ae5ebd6b67fca359   | eOTU0420 | PnecC  | MT989235 |
| 675 | 83a4272d30c7cd8bc48c746c00c7ef8a  | eOTU0421 | PnecC  | MT989236 |
| 676 | f0de3c0aa74dcea1a455e9d3be54a8195 | eOTU0422 | PnecC  | MT989237 |
| 677 | 15117fbdacf05bd3f6e89c2e51497c30  | eOTU0423 | PnecC  | MT989238 |
| 678 | 28a7dcc023e28e648e72bdeb4077a54   | eOTU0424 | PnecC  | MT989239 |
| 679 | 32934618a533a7e8df791fe4551d7d30  | eOTU0425 | PnecC  | MT989240 |
| 680 | 3d6e46696819eb0d02f1e8adcf886c81  | eOTU0426 | PnecC  | MT989241 |
| 681 | 3e25f29788e9ff85b075d8af74f309e8  | eOTU0427 | PnecC  | MT989242 |
| 682 | 629d6d8827d5fc2c8e8e2a85e2a2c63   | eOTU0428 | PnecC  | MT989243 |
| 683 | 6fa9be5c9579453c44ada99db85890    | eOTU0429 | PnecC  | MT989244 |
| 684 | 75310ced903df715ffe85c2e12321471  | eOTU0430 | PnecC  | MT989245 |
| 685 | 7bee84e19efd3c501fdad5346cb3272a  | eOTU0431 | PnecC  | MT989246 |
| 686 | 92996f10ab4dc429fa8fec5135ab0c    | eOTU0432 | PnecC  | MT989247 |
| 687 | a29de119339cc4de51f5613d8aef185e  | eOTU0433 | PnecC  | MT989248 |
| 688 | aa4bf5661b5d91daac40f477f674fdccc | eOTU0434 | PnecB1 | MT989249 |
| 689 | b7270b7df49baabec912484e64cc1bd5  | eOTU0435 | PnecC  | MT989250 |
| 690 | bfc91273893ada75b1295a9082c5abf9  | eOTU0436 | PnecC  | MT989251 |
| 691 | c2d7797d16d6ac7f86721b7dee379312  | eOTU0437 | PnecB1 | MT989252 |
| 692 | c8b47e7cd46be810f5a3c60fae8a52ce  | eOTU0438 | PnecC  | MT989253 |
| 693 | dad9e24948f17dae241f6b9795afbb49  | eOTU0439 | PnecC  | MT989254 |
| 694 | ee1607a26eb1911ba740bc70dbe0286f  | eOTU0440 | PnecC  | MT989255 |
| 695 | ef7700f0f42c88bf05bb90c4be688f5d  | eOTU0441 | PnecC  | MT989256 |
| 696 | fef841c1921c4f92831dc0c4ca7d0760  | eOTU0442 | PnecC  | MT989257 |
| 697 | 039f92f71d7f702196275274f86c2297  | eOTU0443 | PnecC  | MT989258 |
| 698 | 073feb3a0c1255ebc2c1bd19797afe0a  | eOTU0444 | PnecC  | MT989259 |
| 699 | 193b4a33c182f121f1126a87f050021b  | eOTU0445 | PnecB1 | MT989260 |
| 700 | 1c3c53ec032a6c51228f1aa6c89b0f2   | eOTU0446 | PnecC  | MT989261 |
| 701 | 532e1463f14255c00e8e1268c069bf44  | eOTU0447 | PnecC  | MT989262 |
| 702 | 55ba8d776f5124481d6e4ee802fffb8d  | eOTU0448 | PnecC  | MT989263 |
| 703 | 5d3dd2995ad8889a40f449fab7061c6   | eOTU0449 | PnecC  | MT989264 |
| 704 | 96b1f19b5870bd2f5395af852d2afe01  | eOTU0450 | PnecC  | MT989265 |
| 705 | 9855c608cf606d32bd218fc7c6d27e9e  | eOTU0451 | PnecC  | MT989266 |
| 706 | aae09e2924b8e437ddcc6b9cd38fdb5   | eOTU0452 | PnecC  | MT989267 |
| 707 | ccf6441ffafecc7fb2bebb8fa2a2733   | eOTU0453 | PnecC  | MT989268 |
| 708 | e0026366f803acd2d4a45f3e7ffadcaa  | eOTU0454 | PnecB1 | MT989269 |
| 709 | ed5bcf79f315db22254590af9c87dd33  | eOTU0455 | PnecC  | MT989270 |
| 710 | 00d1db856cbdb06794176ae4866f097f  | eOTU0456 | PnecC  | MT989271 |
| 711 | 0e1ffc584297c6c9925b34a3053bdb5   | eOTU0457 | PnecC  | MT989272 |
| 712 | 1d021546a64a3bc04f27e7a7800216e7  | eOTU0458 | PnecC  | MT989273 |
| 713 | 3dbd5a74bc96ac3e6c46979d511824af  | eOTU0459 | PnecC  | MT989274 |
| 714 | 52107ece0e5b46bf2c28f4e9c569688a  | eOTU0460 | PnecC  | MT989275 |
| 715 | 5653035720005cfa03977bb057a5a909  | eOTU0461 | PnecC  | MT989276 |
| 716 | 608ab49e9a120fae58d3ba3a464dcab12 | eOTU0462 | PnecC  | MT989277 |
| 717 | 78ac806c9b6c6a93d3c5e7db5e00e33   | eOTU0463 | PnecC  | MT989278 |
| 718 | 7950880b1495e8094ad9eb96ef21564   | eOTU0464 | PnecC  | MT989279 |
| 719 | 809e6767ba765ba97465ac59e5d5f18b  | eOTU0465 | PnecC  | MT989280 |
| 720 | 851305e388bac80c8472d775d1811f17  | eOTU0466 | PnecC  | MT989281 |
| 721 | 8c9280efc91d097544d3cc2505f122a9  | eOTU0467 | PnecB1 | MT989282 |
| 722 | 9635cd713a0667bc3c74827011b6b606  | eOTU0468 | PnecC  | MT989283 |
| 723 | a982117971c9bd62f1486948f2e7e629  | eOTU0469 | PnecC  | MT989284 |
| 724 | d9c046f95a06f1e5aa0a142e56294aad  | eOTU0470 | PnecC  | MT989285 |
| 725 | dc6952de8de72106acce3c7178203b0   | eOTU0471 | PnecC  | MT989286 |
| 726 | e0a8661d299be887fc45577c6cd69e1d  | eOTU0472 | PnecC  | MT989287 |
| 727 | 1c3da9b9e5023372bb2f967dd252305a  | eOTU0473 | PnecC  | MT989288 |

|     |                                   |          |        |          |
|-----|-----------------------------------|----------|--------|----------|
| 728 | 26aa8b40755dfac6e5e568b260c37dbd  | eOTU0474 | PnecC  | MT989289 |
| 729 | 2c6a03ea1e02eb2354a4547ccd7c8282  | eOTU0475 | PnecB1 | MT989290 |
| 730 | 4d7ef9e87bd1dabd6f4bb51a3369b0cc  | eOTU0476 | PnecC  | MT989291 |
| 731 | 53668e2aa290e7683cd765fd60bef63   | eOTU0477 | PnecC  | MT989292 |
| 732 | 6e089e70cab621772b79aa05bba46b2e  | eOTU0478 | PnecC  | MT989293 |
| 733 | 7addfe432da3badf92b9e6c73241d95d  | eOTU0479 | PnecC  | MT989294 |
| 734 | d824fea75d67994a5f383211691f28e3  | eOTU0480 | PnecC  | MT989295 |
| 735 | dcdba3b17957f0b99e4954a912bf54f3  | eOTU0481 | PnecC  | MT989296 |
| 736 | ddcc905eddabda2365aeaa0b73821d3e8 | eOTU0482 | PnecB1 | MT989297 |
| 737 | e6ebbf44720cfbfbfc812eed98900cec  | eOTU0483 | PnecC  | MT989298 |
| 738 | 06261f86f92b3a822b09bcf87a0a0ff   | eOTU0484 | PnecC  | MT989299 |
| 739 | 0aa136ac2f4fd629f0ca041bdfcb8641  | eOTU0485 | PnecC  | MT989300 |
| 740 | 1538fada88fc99739a4c119d313d4784  | eOTU0486 | PnecC  | MT989301 |
| 741 | 28a05f2b2671937546b540cffe597d1d  | eOTU0487 | PnecC  | MT989302 |
| 742 | 39008eb4ca6995e9e6827ef198c30b33e | eOTU0488 | PnecC  | MT989303 |
| 743 | 52b4fcd51af392713a655b093e98ea0b  | eOTU0489 | PnecB1 | MT989304 |
| 744 | 6fc987d9bda76d98586d05259b4f691d  | eOTU0490 | PnecC  | MT989305 |
| 745 | 8f3e02cb7f496d7bccca1a3f330aa406  | eOTU0491 | PnecC  | MT989306 |
| 746 | 91df0877ab5b4e42b44e9b6ebefb566d  | eOTU0492 | PnecC  | MT989307 |
| 747 | 97b387797c8dbca87593736dad922f65  | eOTU0493 | PnecC  | MT989308 |
| 748 | a042e0324d339592f5b48a64bcf9a491  | eOTU0494 | PnecB1 | MT989309 |
| 749 | bbb1a2fe829dccaecf95059ac60c96e   | eOTU0495 | PnecB1 | MT989310 |
| 750 | dd4fceb29a2997d85af85a26d2d2faeef | eOTU0496 | PnecC  | MT989311 |
| 751 | 1362bd1abe445a43efc78b64b480c6b5  | eOTU0497 | PnecC  | MT989312 |
| 752 | 178b658c2af7fa2e83baf2a3f7e5c51e  | eOTU0498 | PnecC  | MT989313 |
| 753 | 44e2c3049369bea0e7b1ff1aa50f46d8  | eOTU0499 | PnecC  | MT989314 |
| 754 | 53ecf4967daf3ca15a2fe2dc8070182d  | eOTU0500 | PnecC  | MT989315 |
| 755 | 549f135f4426b83c4106d54af6ae3c78  | eOTU0501 | PnecB1 | MT989316 |
| 756 | 654734264c4c1702583e5042faa6ae0b  | eOTU0502 | PnecC  | MT989317 |
| 757 | 7cf9757f0a3c30e0bbf428f0ee9c7da0  | eOTU0503 | PnecC  | MT989318 |
| 758 | 7e8fe8db3b8cc6be1727f5dba7c5b922  | eOTU0504 | PnecC  | MT989319 |
| 759 | b257f3a6557df9df232d1455ec3a1a66  | eOTU0505 | PnecC  | MT989320 |
| 760 | b65e03e274401d53bf5b80dd36831013  | eOTU0506 | PnecC  | MT989321 |
| 761 | c9a339c759dcf0dd58920f76aa49aa74  | eOTU0507 | PnecB1 | MT989322 |
| 762 | e47f3adf34a78fe64b3ad204b4a4d9e5  | eOTU0508 | PnecC  | MT989323 |
| 763 | f2a757678969decf47ad77276eff6401  | eOTU0509 | PnecC  | MT989324 |
| 764 | 176575d3c69b46285584eedf9264c980  | eOTU0510 | PnecC  | MT989325 |
| 765 | 23c760b7568018c1f2b721fa35ac29d5  | eOTU0511 | PnecC  | MT989326 |
| 766 | 39350c5973f66a40449c1e51b434af60  | eOTU0512 | PnecC  | MT989327 |
| 767 | 87dcbceef849afb415bcad58ffce857d  | eOTU0513 | PnecC  | MT989328 |
| 768 | 9bde41995886312ff409c8e2420179d8  | eOTU0514 | PnecC  | MT989329 |
| 769 | a3bc5528434cb0c399e8cb5664bc0605  | eOTU0515 | PnecB1 | MT989330 |
| 770 | d9170bddf5c1233610c60a38475961ee  | eOTU0516 | PnecC  | MT989331 |
| 771 | dcd95b82f9e037ed20a046a695baec85  | eOTU0517 | PnecC  | MT989332 |
| 772 | e0ca185a60b352db40c3d7cce32e945a  | eOTU0518 | PnecC  | MT989333 |
| 773 | e4dc13f59527cbf7aa3bd8f5e4936cb8  | eOTU0519 | PnecB1 | MT989334 |
| 774 | f2ec76d12de7f56359568ff6eb099cad  | eOTU0520 | PnecB1 | MT989335 |
| 775 | fbe033771e5269704275b540465d41b9  | eOTU0521 | PnecB1 | MT989336 |

**Suppl. Mat. Table S3.** Mantel tests and partial Mantel tests (Spearman rank correlations, 9999 permutations) were used to analyse if dissimilarity between *Polynucleobacter* communities increase with geographic distance or with differences in pH or other environmental or climatic variables. Environmental distances represent Euclidean distances calculated by the `dist()` function of the `vegan` package. All environmental data but pH were log-transformed prior to distance calculations. BC, Bray-Curtis dissimilarity; BC\_lowCa, only low Ca<sup>2+</sup> samples; geoDist, geographic distance; pHDist, pH distance between samples; CaDist, Ca<sup>2+</sup> concentration distance between samples; envDist, distance based on four environmental variables<sup>§</sup>, EnvGeoClimDist, distance based on geographic, climatic and environmental variables<sup>§§</sup>.

| Test                               | No control                | Control for pH (pHDist)  | Control for Ca <sup>2+</sup> (CaDist) | Control for envDist <sup>§</sup> | Control for EnvGeoClimDist <sup>§§</sup> | Control for geoDist     |           |
|------------------------------------|---------------------------|--------------------------|---------------------------------------|----------------------------------|------------------------------------------|-------------------------|-----------|
| BC vs geoDist                      | r = -0.0132<br>p = 0.6553 | r = 0.0081<br>p = 0.3727 | r = 0.0463<br>p = 0.0531              | r = 0.0110<br>p = 0.3411         | r = -0.0596<br>p = 0.9687                |                         | p > 0.05  |
| BC_lowCa vs geoDist                | r = 0.1237<br>p = 2e-04   | r = 0.0728<br>p = 0.0073 | r = 0.1283<br>p = 1e-04               | r = 0.1102<br>p = 5e-04          | r = 0.0514<br>p = 0.0602                 |                         | P < 0.01  |
| BC vs pHDist                       | r = 0.5267<br>p = 1e-04   |                          | r = 0.4725<br>p = 1e-04               |                                  |                                          | r = 0.5266<br>p = 1e-04 | p < 0.001 |
| BC vs CaDist                       | r = 0.3722<br>p = 1e-04   | r = 0.2722<br>p = 1e-04  |                                       |                                  |                                          | r = 0.3745<br>p = 1e-04 |           |
| BC vs envDist <sup>§</sup>         | r = 0.3552<br>p = 1e-04   |                          |                                       |                                  |                                          | r = 0.3551<br>p = 1e-04 |           |
| BC vs EnvGeoClimDist <sup>§§</sup> | r = 0.1837<br>p = 2e-04   |                          |                                       |                                  |                                          | r = 0.1463<br>p = 0.003 |           |

<sup>§</sup> Ca<sup>2+</sup>, pH, Abs<sub>250nm</sub>, Na<sup>+</sup>

<sup>§§</sup> geographic distance, altitude, climate, envDist, habitat type
